# Supplementary material for: The development, feasibility and acceptability of a school-based obesity prevention programme: results from three phases of piloting
Source: PubMed Central journal article supplement — BMJ Open. 2011 May 23;1(1):e000026. doi: 10.1136/bmjopen-2010-000026 (PMC3191390; doi:10.1136/bmjopen-2010-000026), 2011-05-23
Supplement: bmjopen-2010-000026.draft_revisions.pdf [file bmjopen-2010-000026.draft_revisions.pdf]

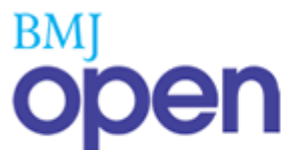

**The development, feasibility and acceptability of a school-based obesity prevention programme: Results from three phases of piloting.**

|                               |                                                                                                                                                                                                                                                                              |
|-------------------------------|------------------------------------------------------------------------------------------------------------------------------------------------------------------------------------------------------------------------------------------------------------------------------|
| Journal:                      | <i>BMJ Open</i>                                                                                                                                                                                                                                                              |
| Manuscript ID:                | BMJ Open-2010-000026                                                                                                                                                                                                                                                         |
| Article Type:                 | Research                                                                                                                                                                                                                                                                     |
| Date Submitted by the Author: | 01-Dec-2010                                                                                                                                                                                                                                                                  |
| Complete List of Authors:     | Lloyd, Jennifer; Peninsula College of Medicine and Dentistry, Institute for Health Service Research<br>Wyatt, Katrina; Peninsula College of Medicine and Dentistry<br>Creanor, Siobhan; University of Plymouth<br>Logan, Stuart; Peninsula College of Medicine and Dentistry |
| <b>Subject Heading</b>:       | Public health                                                                                                                                                                                                                                                                |
| Keywords:                     | Child, Obesity, Intervention, Feasibility Study, Health Behaviours                                                                                                                                                                                                           |
|                               |                                                                                                                                                                                                                                                                              |

SCHOLARONE™  
Manuscripts

only

1  
2  
3 The development, feasibility and acceptability of a school-based obesity prevention  
4 programme: Results from three phases of piloting.  
5  
6  
7

8  
9 Katrina M Wyatt<sup>1</sup> \* Jennifer J Lloyd<sup>1</sup> Siobhan Creanor<sup>2</sup> Stuart Logan<sup>3</sup>  
10

11 <sup>1,3</sup> Institute for Health Service Research, Peninsula College of Medicine and Dentistry, University of  
12 Exeter, Exeter, UK  
13

14 <sup>2</sup>Centre for Health & Environmental Statistics, University of Plymouth, Plymouth, UK  
15

16  
17 Email addresses:  
18

19  
20 KMW: [katrina.wyatt@pms.ac.uk](mailto:katrina.wyatt@pms.ac.uk)  
21  
22

23  
24  
25 \*JL: [jennifer.lloyd@pms.ac.uk](mailto:jennifer.lloyd@pms.ac.uk)  
26  
27

28  
29  
30 SC: [siobhan.creanor@plymouth.ac.uk](mailto:siobhan.creanor@plymouth.ac.uk)  
31  
32

33  
34  
35 SL: [stuart.logan@pms.ac.uk](mailto:stuart.logan@pms.ac.uk)  
36  
37

38  
39 \*Corresponding author: Tel: 01392 722972 Fax: 01392 421009  
40

41 The Corresponding Author has the right to grant on behalf of all authors and does grant on behalf of all authors, an exclusive licence (or non-exclusive for  
42 government employees) on a worldwide basis to the BMJ Publishing Group Ltd and its Licensees to permit this article (if accepted) to be published in Archives of  
43 Disease in Childhood and any other BMJ PGL products to exploit all subsidiary rights, as set out in our licence  
44

45  
46  
47 Key words: Child, obesity, intervention, feasibility study, health behaviours  
48

49 Word count: 3,108  
50  
51  
52  
53  
54  
55  
56  
57  
58  
59  
60

**ABSTRACT**

**Objectives:** To develop a school-based obesity prevention programme and evaluate the feasibility and acceptability of the intervention and the planned definitive cluster randomized trial.

**Design:** Three stage pilot involving six schools (395 children) in Southwest England, including an exploratory randomised controlled trial and qualitative interviews and focus groups with teachers, parents and children.

**Intervention:** The Healthy Lifestyle Programme uses a range of activities including lessons, assemblies, parents' evenings, interactive drama workshops and goal setting to engage schools, children and their families.

**Results:** Of the 395 eligible children in the three pilot phases, only four opted out and a further three children withdrew from the exploratory trial. In the exploratory trial, baseline measures (anthropometric and behavioural) were obtained for 199/201 eligible children in 4 schools and both 18 and 24 month outcome measures for 193/199 participants and 190/193 respectively. Qualitative data show that delivery of the intervention is feasible within schools and acceptable to teachers, children and families. In the exploratory trial 17/77 (22%) in the intervention schools and 31/122 (25%) in the control schools were overweight or obese at baseline, increasing, at 18 months follow up, to 38/119 (32%) in the control schools compared with 18/74 (24%) in the intervention schools.

1  
2  
3 **Conclusion:** The Healthy Lifestyle Programme is feasible to deliver and acceptable to schools,  
4  
5 children and their families. We recruited, retained and obtained outcome measures from  
6  
7 virtually all eligible children in the exploratory trial, including measures taken after transition to  
8  
9 secondary school suggesting that a definitive trial is likely to be deliverable.  
10  
11

#### 12 13 14 **Article focus**

- 15  
16  
17 • To show the development and evaluation of a school-based obesity prevention  
18  
19 programme through 3 stages of piloting  
20  
21
- 22  
23 • To present evidence for the feasibility and acceptability of the HeLP Programme for  
24  
25 schools, children and their families  
26  
27
- 28  
29 • To present the evidence of the feasibility of the trial design and outcome measures  
30  
31 through an exploratory trial involving 4 schools and 199 children.  
32  
33

#### 34 35 36 **Key messages**

- 37  
38 • The HeLP Programme has been systematically developed using an intervention mapping  
39  
40 protocol and uses drama based activities to engage the school, children and their  
41  
42 families  
43  
44
- 45  
46 • The Programme has been piloted in six schools involving 395 children and results  
47  
48 suggest that it is acceptable and feasible to schools, children and their families  
49  
50
- 51  
52 • Results from the pilot phases have provided sufficient information to support the  
53  
54 evaluation of the HeLP intervention in a full scale trial  
55  
56  
57  
58  
59  
60

## Strengths and Limitations

Strengths: The HeLP intervention has undergone a systematic development process involving considerable stakeholder consultation and piloting. This has enabled the researchers to gain a deeper understanding of the context in which the intervention was to be delivered in order to maximize engagement at all levels. Preliminary results suggest the possibility that the Programme may affect behaviours associated with overweight and obesity.

Limitations: Interviews and focus groups were carried out by the lead researcher who had built up a relationship with the schools, children and their families. This may have affected responses as the participants might not have wanted to express negative opinions. However, the ongoing support and retention of the schools and children would suggest that if there was an effect, it was a very slight one.

## Background

There has been a substantial increase in the proportion of children in the UK who are overweight [1]. The Health Survey for England (2007) reported that 19% of girls and 18% of boys aged 11-15 were obese and 34% of girls and boys were overweight or obese [1]. The National Child Measurement Programme (2008/2009) reported that by age 10-11 years, school year 6, nearly one in three children were either overweight or obese [2]. Being overweight in childhood is associated with adverse consequences including metabolic abnormalities, increased risk of Type II diabetes, and musculo-skeletal and psychological problems [3]. Over 50% of obese children become obese adults [4] with significant health consequences [5].

Obesity results from an imbalance between consumption and expenditure of energy.

Epidemiological studies suggest a number of risk factors, the strongest of which is having one or more overweight parents [6] and there are also strong associations, between the risk of overweight and socio-economic status, diet, physical activity levels and other lifestyle factors [7]. At a population level, the consumption of processed and fast food, including sweetened fizzy drinks, has increased while that of fruit and vegetables has declined and portion size in pre-packaged food has increased substantially [8].

The association with overweight and obesity and physical activity remains contested with cross sectional studies showing a reduction in levels and intensity of physical activity in children and an increase in % body fat [9]. Longitudinal studies are scarce, although recent data suggests that fatness leads to a reduction in physical activity rather than the other way round [10]. Some

1  
2  
3 studies have reported an association between time spent watching television and obesity [11].  
4  
5 Not only is television viewing a sedentary activity but it is also positively correlated with total  
6  
7  
8  
9 calorific intake [12] and the consumption of snack foods [13].

10  
11 The most recent systematic review (2008) of controlled trials of school-based interventions  
12  
13 concluded that interventions which increase activity and reduce sedentary behaviour may help  
14  
15 children to maintain a healthy weight, although results were short-term and inconsistent [14].  
16  
17 The review also reported that trials of dietary interventions also produced inconsistent results,  
18  
19 although the reviewers suggest that a combined approach may be more effective in preventing  
20  
21 children becoming overweight in the long term.  
22  
23  
24  
25  
26

27  
28 The Healthy Lifestyle Programme (HeLP) is a school-based intervention which seeks to deliver  
29  
30 healthy lifestyle messages and provide simple individually-tailored strategies to assist change  
31  
32 relating to healthy activity and eating. HeLP takes a population approach seeking to change  
33  
34 behaviour at a family as well as at an individual and institutional level. The development of  
35  
36 HeLP followed the MRC guidance for the development and evaluation of complex interventions  
37  
38 [15]; the stages of development were not linear, as each phase fed back into the development  
39  
40 and refinement of the Programme. This paper reports on the iterative development and  
41  
42 refinement of HeLP and presents results from, an initial development stage, a 'proof of  
43  
44 concept' phase and preliminary results from an exploratory trial.  
45  
46  
47  
48  
49  
50  
51  
52  
53  
54  
55  
56  
57  
58  
59  
60

## METHODS

The intervention: HeLP aims to deliver a general healthy lifestyle message relating to the energy balance. Within this context, three key messages are emphasised: a decrease in the consumption of sweetened fizzy drinks; an increase in the proportion of healthy snacks consumed and a reduction in TV viewing and other screen-based activities. These messages are consistent with the strategies suggested in the NICE guidance [16]. To avoid alienating families the messages are presented within an overarching “80:20 message”, suggesting they should aim to maintain healthy behaviours “80%” of the time. An Intervention Mapping process [17] was undertaken to develop the individual components of the intervention and determine possible behaviour change techniques and implementation strategies, to be reported elsewhere.

### ***Development and Evaluation Process***

#### *Phase 1 - Developing the intervention (2005-2006; One school; n=119 children, aged 8-11)*

Following the Intervention Mapping process, we worked with children, parents and teachers from a single junior school to try candidate behaviour change approaches for different age groups. We delivered healthy lifestyle messages to three age groups, 8-9 year olds; 9-10 year olds and 10-11 year olds, using lessons and either drama or goal setting. Focus groups and semi-structured interviews were held with children and teachers. Parents were invited to complete a questionnaire about the study.



1  
2  
3 *Phase 2 – Proof of Concept - Pilot of intervention and outcome measures (2006-2008; One*  
4 *school; n=77 children, aged 9-10)*  
5  
6  
7

8  
9  
10 Based on the results from the first phase, the intervention was further developed (figure 2) and  
11 evaluated in a second junior school, in an area of high social deprivation, with three Year 5  
12 classes. Baseline and 6 week post-intervention height, weight, waist circumference, % body fat,  
13 objective physical activity, food intake and TV viewing/screen based activity were assessed. For  
14 the anthropometric measures children were asked to remove their shoes and socks. Height was  
15 measured using a portable SECA stadiometer (Hamburg, Germany) and recorded to an accuracy  
16 of 1mm. Weight and body fatness was measured using the Tanita SC330 portable body  
17 composition analyser (U.K. Ltd., Middlesex, U.K.). Weight was recorded to within 0.1kg. Body  
18 fatness was estimated from leg to leg bioelectrical impedance. Waist circumference was  
19 measured using a non-elastic flexible tape 4cm above the umbilicus.  
20  
21  
22  
23  
24  
25  
26  
27

28  
29  
30 Food intake was assessed using the adapted version of the Food Intake Questionnaire (FIQ)  
31 [18], an adapted recall method which asks whether specific foods were consumed the previous  
32 day. Children completed the FIQ twice in order to obtain a weekday and weekend food intake.  
33  
34  
35 These results were then combined and weighted to calculate the mean number of different  
36 healthy snacks, energy dense snacks; positive and negative foods consumed each day. TV  
37 viewing/screen based usage was assessed using the adapted version of the Children's TV  
38 Viewing Habits Questionnaire [19]. Participants were asked to record the time (in minutes) they  
39 usually spent watching TV or doing other leisure time screen-based activities on weekdays  
40 before school, before tea and after tea and on the weekend (Saturday and Sunday morning,  
41 afternoon and evening). The results were then combined and weighted to calculate the mean  
42 time spent watching TV/doing leisure time screen-based activities each day. To assess physical  
43 activity, children were asked to wear a GT1M Actigraph (Actigraph LLC, Pensacola,  
44  
45  
46  
47  
48  
49  
50  
51  
52  
53  
54  
55  
56  
57  
58  
59  
60

1  
2  
3 FLhttp://www.theactigraph.com) during waking hours over seven consecutive days (5  
4  
5 weekdays and one weekend). Two focus groups (n=14) were held with children who 'engaged  
6  
7 fully' (defined by enthusiasm for the study, desire to set and maintain goals) and a further focus  
8  
9 group with those who appeared 'indifferent' to the study and the messages (n=4). Interviews  
10  
11 were held with the staff and head teacher and parents of the children (n=7).  
12  
13  
14

15  
16  
17 *Phase 3 - Exploratory randomised controlled trial (2008-2010; 4 schools; n=201 children, aged 9-*  
18  
19 *10)*  
20

21  
22 Phase 3 sought to assess, for schools, children and their families: recruitment and retention in  
23  
24 control and intervention schools; feasibility and acceptability of the HeLP intervention and of  
25  
26 future trial outcome measures and facilitators and barriers to the uptake of the intervention. All  
27  
28 state Primary and Junior schools in Exeter were eligible to take part if they had at least one  
29  
30 single age year 5 group (i.e. not year 4/5 or 5/6 mixed classes). Schools were recruited via the  
31  
32 Devon Association of Primary Head teachers. Baseline height, weight, waist circumference, %  
33  
34 body fat, food intake, TV viewing/screen-based activity and physical activity (as in phase 2)  
35  
36 were collected prior to randomisation. These same measures were then collected 18 months  
37  
38 post baseline and anthropometric measures only were collected 24 months post baseline which  
39  
40 involved tracking the children to their secondary school. All anthropometric measures at each  
41  
42 time point were taken by an independent assessor blind to allocation. Focus groups (children)  
43  
44 and semi structured interviews (teachers and parents) have been conducted by the researchers  
45  
46 in control and intervention schools.  
47  
48  
49  
50  
51  
52  
53  
54  
55  
56  
57  
58  
59  
60

## RESULTS

**Phase 1:** Of the 120 children invited to participate, only one child opted out (Figure 1). Many parents reported in the questionnaire positive parent/family behaviour changes. Focus groups with children and teachers suggested that Year 5 (9-10 year olds) children were both receptive to the messages and more able and willing to translate them into possible behaviour changes and that drama and goal setting had the potential to work synergistically. Parents and children also highlighted the need for a greater variety of activities in the initial term.

**Phase 2:** The intervention was refined from the results of Phase 1 (Figure 2). No child opted out and no adverse events (e.g. feeling stigmatised) were reported by parents, teachers or children in questionnaires, focus groups or private discussions. Staff were enthusiastic about the Programme, in part because it met the National Curriculum guidelines for Personal Social Health Education (PSHE) and Citizenship, and importantly because they felt it promoted families' engagement with the school. Self-report questionnaires and accelerometry data suggested changes with respect to snacking and sedentary behavior. Detailed qualitative research (to be reported separately) with children and families suggested that they found the intervention acceptable, with a significant proportion of parents commenting that their family had made lifestyle changes. Teachers suggested additional activities for the next term to reinforce the messages and children suggested that they would like their parents to participate in the forum theatre.

1  
2  
3 **Phase 3:** The intervention was further refined (Figure 3). Eight schools expressed an interest in  
4  
5 participating in this exploratory trial and four schools (seven classes) were randomly selected to  
6  
7 take part.  
8  
9

### 10 11 **Feasibility Measures**

12  
13  
14  
15 Of the 201 children eligible to participate, two opted out of the study. Baseline anthropometric  
16  
17 measures, food intake and TV viewing/screen based activity were recorded for 199 children.

18  
19 We measured physical activity, using accelerometry, from one randomly selected class in each  
20  
21 of the 4 participating schools. Measures were successfully obtained from 109/111. Numbers  
22  
23 with useable data are presented in Table 1.  
24  
25

26  
27  
28 Prior to the 18 month post baseline measures, two children (control schools) had left the area  
29  
30 and one child opted out (control school). Three girls in the same intervention school withdrew  
31  
32 prior to the 18 month measures being collected; this coincided with the children being given a  
33  
34 simple snacking and activity diary to complete over a 2 week period and feedback (teacher and  
35  
36 parents) suggested this focused the girls too much on what they were eating and their parents  
37  
38 felt they were restricting certain food groups.  
39  
40  
41  
42  
43  
44

45 Eighteen month post baseline measures have been collected from 193/199 children, with  
46  
47 107/111 children providing accelerometry data. Numbers with useable data are presented in  
48  
49 Table 1. At collection of the twenty four month anthropometric data, one girl (control school)  
50  
51 did not want to be measured and two children (both control schools) had moved out of the  
52  
53 area, therefore data was obtained from 190/193 children (98%).  
54  
55  
56  
57  
58  
59  
60

### Baseline Data from the Exploratory trial

A quarter were classified as overweight or obese 22% (17/77) from the intervention school and 25% (31/122) from control schools. One child (intervention school) was classified as being underweight [20].

*Food intake:* The Food Intake Questionnaire data suggested that children consumed a mean of 4.15 (95% CI 3.85 to 4.44) different energy dense snacks (EDS) per day and a mean of 3.35 (95% CI 3.12 to 3.58) healthy snacks (HS). The mean number of different positive and negative food markers consumed each day was 7.45(95% CI 7.02 to 7.89) and 6.77(95% CI 6.32 to 7.22) respectively.

*TV viewing:* Children's TV Viewing Habits questionnaire showed that mean daily time spent watching TV was 2.6 hours (95% CI 2.36-2.83). Fifty four percent of children had TVs in their bedrooms and 51% had no rules at home regarding the amount of TV/screen-based media they could watch/use.

*Physical activity:* Daily mean time spent in moderate to vigorous physical activity (MVPA) and sedentary activity was 43 minutes (95% CI 40.13-47.08) and 16 hours (95% CI 15.8-16.5) respectively.

### *Summary of 18 month post baseline data from the Exploratory trial*

The proportion of overweight and obese children increased in the control schools from 25% (31/122) to 32% (38/119). The proportion of overweight and obese children in the intervention school rose very slightly from 22% (17/77) to 24% (18/74). Other anthropometric data and the

1  
2  
3 results from the questionnaires and accelerometry including 24 month follow up will be  
4  
5 reported elsewhere.  
6  
7

### 8 9 **Process evaluation**

10 All children (n=77) in the intervention schools participated in the healthy lifestyle week and 90%  
11  
12 set goals with their families around lifestyle change. Seventy five percent of parents have  
13  
14 participated in one or more 'engagement' event. Detailed results from the interviews with  
15  
16 parents (n=21) and teachers (n=11) and focus groups with the children (n=6) will be reported in  
17  
18 detail elsewhere. In summary, parents were adamant their children's diet and activity choices  
19  
20 were their responsibility but felt school was a good place to reinforce these messages. Parents  
21  
22 reported a greater acceptance of rules relating to screen-time and healthy eating in their child  
23  
24 as well as initiating discussion with other family members around healthy lifestyles.  
25  
26  
27  
28  
29

30  
31 Teachers agreed year 5 was the right target group as children are gaining independence whilst  
32  
33 still amenable to the messages. Some commented that the intervention had boosted the  
34  
35 children's self-esteem, had a positive effect on the class socially and created additional  
36  
37 opportunities to link with parents. Teachers felt using young actors to deliver the messages was  
38  
39 the key to achieving engagement with this age group. Children were unanimous in their  
40  
41 enjoyment of the drama activities and equally unequivocal that these activities should be  
42  
43 carried out by people external to the school. They did not comment on the weighing and  
44  
45 measuring and when this was brought up in the focus groups, dismissed it as 'fine'. The key  
46  
47 message the children remembered was the importance of replacing unhealthy snacks with  
48  
49 more healthy alternatives and replacing screen-based activities with more active pursuits which  
50  
51 they enjoy.  
52  
53  
54  
55  
56  
57  
58  
59  
60

## DISCUSSION

To date the evidence base for effective interventions to prevent and reduce childhood obesity is limited but suggests that a multi-component approach, addressing both sides of the energy balance and engaging families as well as the children, is more likely to be effective [14]. Using an intervention mapping protocol [17] we used a variety of methods (literature reviews, discussions with stakeholders and experts in behavioural science and obesity research) to create a programme of activities which aim to engage and change behaviours at a school, child and family level.

The Healthy Lifestyle Programme was further developed and refined through a series of pilot stages involving children, families and teachers. Throughout each pilot stage, qualitative and quantitative data was used to examine process as well as outcome. For each activity we attempted to assess the extent to which it promoted engagement of children and their families. Feedback in interviews as well as observation and informal discussions are strongly supportive of the Programme showing that the activities act synergistically to engage at all levels.

Finally we sought to determine whether our proposed trial design and the outcome measures are feasible and acceptable for the schools as well as the individual children and their families.

The baseline anthropometric data from Phase 3 is very similar to national figures reported in the Health Survey for England (2007) and the National Child Measurement Programme (NCMP) (2008/9). At 18 months, however, the percentage of overweight and obese children in the

1  
2  
3 control schools increased by 7%, mirroring the local NCMP data for 10-11 year olds in Exeter,  
4  
5 whilst increasing by just 2% in the intervention schools. Although the exploratory trial was not  
6  
7 powered to detect statistically significant differences between intervention and control schools,  
8  
9 the finding that the proportions overweight and obese increased only slightly in the  
10  
11 intervention schools is encouraging, particularly in light of recent tracking data showing a  
12  
13 greatly increased odds of becoming obese in adolescence if the child was overweight in early  
14  
15 childhood [21].  
16  
17  
18  
19

20  
21 One of the key outcomes of interest was whether we had created a whole population approach  
22  
23 and in particular whether overweight and obese children were happy and willing to participate.  
24  
25

26  
27 Only 4 of the 395 children invited to participate over the three phases of development opted  
28  
29 out (two prior to baseline and one prior to the 18 month follow and one prior to the 24 month  
30  
31 follow up measures). Two children had left the area prior to the 18 month and and further 2  
32  
33 had left the area prior to the 24 month follow up measures. Three girls from the same  
34  
35 intervention class in phase 3 withdrew from the study. Prior to this no child had withdrawn.  
36  
37

38  
39 Following meetings with the class teacher and informal chats with parents we have decided to  
40  
41 withdraw the food diary activity at the end of Year 6. This pilot work has, therefore, been  
42  
43 invaluable in helping us understand the perspective of the school, child and family in  
44  
45 developing the HeLP Programme.  
46  
47

48  
49 Using the MRC framework for development and evaluation of complex interventions [15] we  
50  
51 have developed a school-based programme to prevent and reduce obesity in children. We have  
52  
53 demonstrated the feasibility and acceptability of the intervention and shown that it engages  
54  
55  
56  
57  
58  
59  
60



1  
2  
3 children, schools and families. We have also demonstrated that we can recruit schools and  
4  
5 children and collect baseline measures prior to randomisation. Retention of children has been  
6  
7 excellent in all schools.  
8  
9

10  
11 Results from these pilot stages have provided us with the necessary and sufficient information  
12  
13 to suggest that the HeLP intervention should now be evaluated in a full-scale trial.  
14  
15

16  
17 **Acknowledgements:** The authors are very grateful to the participating schools, children and  
18  
19 their families who gave up their time for the study. We would also like to acknowledge Sandy  
20  
21 Akerman (Headbangers Theatre Company) who supported the design of the drama component  
22  
23 of the intervention.  
24  
25

26  
27 **Funding:** Phase 1, 2 and 3 (the ongoing exploratory trial) of development was funded by the  
28  
29 Children's Research Fund (registered charity no. 226128) and the NIHR Research for Patient  
30  
31 Benefit (RfPB) Programme. SL, KW and JL were partially supported by PenCLAHRC, the National  
32  
33 Institute for Health Research (NIHR) CLAHRC for the Southwest Peninsula. This paper presents  
34  
35 independent research commissioned by the National Institute for Health Research (NIHR). The  
36  
37 views expressed are those of the author(s) and not necessarily those of the NHS, the NIHR or  
38  
39 the Department of Health.  
40  
41  
42  
43  
44

45  
46 **Competing interests:** None  
47  
48

49  
50 **Ethics approval:** Ethical approval for each phase of the development and evaluation of the HeLP  
51  
52 intervention was granted from the Peninsula College of Medicine and Dentistry Ethics  
53  
54 Committee. This followed an approach to the NHS ethics committee who felt the study did not  
55  
56 fall within their remit.  
57  
58  
59  
60

1  
2  
3 **Author contribution:** JL and KW drafted the manuscript with SC and SL providing critical  
4  
5 revision. JL developed and supported the design and production of the intervention materials,  
6  
7 coordinated the implementation of the intervention during pilot phases and conducted  
8  
9 interviews with teachers and parents. JL and KW conducted the focus groups and with SL  
10  
11 designed the study and obtained funding. KW will act as guarantor of the paper.  
12  
13  
14  
15

### 16 17 **What is already known on this topic**

18  
19 There is little good quality evidence that existing interventions are effective in preventing and  
20  
21 reducing childhood obesity

22  
23 Interventions which aim to affect diet and activity seem to show more promise than those  
24  
25 targeting either alone

### 26 27 **What this study adds**

28  
29 The Healthy Lifestyle Programme is feasible to deliver and acceptable to children, their families  
30  
31 and to teachers.

32  
33 The intervention package engages staff, children and families and preliminary results suggest  
34  
35 the possibility that it may affect behaviours associated with overweight and obesity.

36  
37 The high levels of recruitment, retention and collection of outcome measures in the exploratory  
38  
39 trial suggest that a definitive trial is deliverable.  
40

### 41 42 **References**

43  
44 [1] **Health Survey for England 2007.** Children's BMI, overweight and obesity. NHS The Information  
45  
46 Centre. [www.ic.nhs.uk/webfiles/publications/HSE07/](http://www.ic.nhs.uk/webfiles/publications/HSE07/)

47  
48 [2] **National Child Measurement Programme:** results from the school year 2008/09 NHS Centre for  
49  
50 Information in Health and Social Care 2009.

51  
52 [3] **Gunnell DJ,** Frankel SJ, Nanchahal K, Peters TJ, Davey Smith G. Childhood obesity and adult  
53  
54 cardiovascular mortality: a 57-y follow-up study based on the Boyd Orr cohort. *Am J Clinical Nutrition*  
55  
56 1998; **67(6):**1111.

57  
58 [4] **Serdula MK,** Ivery D, Coates RJ Freedman DS, Williamson DF, Byers T. Do obese children become  
59  
60 obese adults? A review of the literature. *Prev Med* 1993; **22(2):**167-177.

[5] **Choi BC, Hunter DJ,** Tsou W, Sainsbury P Diseases of comfort: primary cause of death in the 22nd  
century. *J Epidemiol Community Health.* 2005; **59:**1030-4.

- 1  
2  
3 [6] **Lake JK**, Power C, Cole TJ. Child to adult body mass index in the 1958 British birth cohort: associations  
4 with parental obesity. *Arch Dis Child* 1997; **77**:376-81  
5  
6 [7] **Li L**, Law C, Lo Conte R, Power C. Intergenerational influences on childhood body mass index: the  
7 effect of parental body mass index trajectories. *Am J Clin Nutr* 2009; **89**: 551-7  
8  
9 [8] **Nielsen SJ** , Popkin BM, Patterns and trends in food portion sizes, 1977-1998, *JAMA* 2003;**289**:450–  
10 453.  
11  
12 [9] **Jiménez-Pavón D**, Kelly J, Reilly JJ. Associations between objectively measured habitual physical  
13 activity and adiposity in children and adolescents: Systematic review. *Int J Pediatr Obes*. 2010; **5**(1):3-18  
14  
15 [10] **Metcalf BS**, Hosking J, Jeffery AN, Voss LD, Henley W, Wilkin TJ. Fatness leads to inactivity, but  
16 inactivity does not lead to fatness: a longitudinal study in children (EarlyBird 45). *Arch Dis Child*.  
17 Published online first: 23 June 2010. doi: 10.1136/adc/2009.175927.  
18  
19 [11] **Marshall SJ**, Biddle SJ, Gorely T, Cameron N, Murdey I: Relationships between media use, body  
20 fatness and physical activity in children and youth: a meta analysis. *Int J Obes Relat Met Disord* 2004;  
21 **28**(10):1238-46.  
22  
23 [12] **Wiecha JL**, Peterson KE, Ludwig DS, Kim J, Sobol A, Gortmaker SL: When children eat what they  
24 watch. Impact of television viewing on dietary intake in youth. *Archives of Pediatrics & Adolescent*  
25 *Medicine* 2006; **160**: 436–42.  
26  
27 [13] **Halford JCG**, Gillespie J, Brown V, Pontin EE, Dovey TM: Effect of television advertisements for foods  
28 on food consumption in children. *Appetite* 2004; **42**: 221–5.  
29  
30 [14] **Brown T**, Summerbell C A systematic review of school-based interventions that focus on dietary  
31 intake and physical activity levels to prevent childhood obesity: an update to the obesity guidance  
32 produced by the NICE. *Obesity Reviews* 2008; **10**:110-141.  
33  
34 [15] **Medical Research Council**. A new Framework for the development and evaluation of RCTs for  
35 complex interventions to improve health. London: MRC, 2008.  
36 [www.mrc.ac.uk/complexinterventionsguidance](http://www.mrc.ac.uk/complexinterventionsguidance).  
37  
38 [16] **NICE**. Obesity: the prevention, identification assessment and management of overweight and  
39 obesity in adults and children. London: NICE, 2006.  
40  
41 [17] **Bartholomew K**, Parcel GS, Kok G, Gottlieb NH: Planning Health Promotion Programmes: An  
42 intervention mapping approach San Francisco: Jossey-Bass, 2006.  
43  
44 [18] **Johnson B**, Hackett, AF. Eating habits of 11-14 year old school children living in less affluent areas  
45 of Liverpool, UK. *Journal of Human Nutrition and Dietetics* 1997; **10**:135-144.  
46  
47 [19] **Owens J**, Maxim R, McGuinn M, Nobile C, Msall M, Alario A. Television-viewing habits and sleep  
48 disturbance in school children. *Pediatrics* 1999; **104**:e27.  
49  
50 [20] **Cole TJ**, Freeman JV & Preece MA Body mass index reference curves for the UK 1990 *Archives of*  
51 *Disease in Childhood* 1995; **73**:17-24.  
52  
53  
54  
55  
56  
57  
58  
59  
60

1  
2  
3 [21] **Reilly JJ**, Bonataki M, Leary SD et al. Progression from childhood overweight to adolescent obesity  
4 in a large contemporary cohort. *Int J. Ped. Obesity* Published online first: 23 March 2010.  
5 doi:10.3109/17477166.210.497538.  
6

7  
8 [22] **McCarthy HD**, Cole TJ, Fry T, Jebb SA & Prentice AM Body fat reference curves for children.  
9 *International Journal of Obesity* 2006;**30**: 598-602.

10  
11 [23] **McCarthy HD**, Jarrett KV, Crawley HF. The development of waist circumference percentiles in British  
12 children aged 5.0-16.9y. *European Journal of Clinical Nutrition* 2001; **55**: 902-907.  
13  
14  
15  
16  
17  
18  
19  
20  
21  
22  
23  
24  
25  
26  
27  
28  
29  
30  
31  
32  
33  
34  
35  
36  
37  
38  
39  
40  
41  
42  
43  
44  
45  
46  
47  
48  
49  
50  
51  
52  
53  
54  
55  
56  
57  
58  
59  
60

For peer review only

Table 1 – Feasibility Data (numbers of children (percentage))

|                                                      |                |
|------------------------------------------------------|----------------|
| Number of children participated/eligible             | 199/201 (98 %) |
| <b>Baseline measures:</b>                            |                |
| Anthropometric                                       | 199/199 (100%) |
| Food Intake                                          | 199/199 (100%) |
| TV/screen viewing                                    | 199/199 (100%) |
| Physical activity (accelerometry)*                   | 109/111 (98%)  |
| Useable PA data – >=3 week days                      | 104/111 (95%)  |
| Complete useable PA data                             | 93/111 (85%)   |
| <b>18 month follow-up:</b>                           |                |
| Lost to follow-up                                    | 3/199 (1.5%)   |
| Withdrew                                             | 3/199 (1.5%)   |
| <b>18 month measures:</b>                            |                |
| Anthropometric                                       | 193/199 (97%)  |
| Food Intake                                          | 193/199 (97%)  |
| TV/screen viewing                                    | 193/199 (97%)  |
| Physical activity (accelerometry)*                   | 107/111 (96%)  |
| Useable PA data – >=3 week days                      | 95/107 (88%)   |
| Complete useable PA data                             | 83/107 (77%)   |
| <b>24 month follow up</b>                            |                |
| Lost to follow up                                    | 2/193 (1%)     |
| Withdrew                                             | 1/193(0.5%)    |
| <b>24 month measures (only anthropometric taken)</b> |                |
| Anthropometric                                       | 190/193 (98%)  |

\*One class randomly selected from each of the 4 schools

Table 2- Summary of Baseline Data

|                                                                                    | All (n=199) | Male (n=100) | Female (n=99) |
|------------------------------------------------------------------------------------|-------------|--------------|---------------|
| <b>Anthropometric measures:</b>                                                    |             |              |               |
| % Overweight ( $\geq 85^{\text{th}}$ and $< 95^{\text{th}}$ centile) <sup>20</sup> | 8%          | 9%           | 6%            |
| % Obese ( $\geq 95^{\text{th}}$ centile) <sup>20</sup>                             | 16%         | 18%          | 13%           |
| % Overweight or Obese ( $\geq 85^{\text{th}}$ centile) <sup>20</sup>               | 23%         | 27%          | 19%           |
| % Underweight ( $\leq 2^{\text{nd}}$ centile) <sup>20</sup>                        | 0.5%        | 1%           | 0%            |
| % with Bodyfat $\geq 85^{\text{th}}$ centile <sup>22</sup>                         | -           | 21%          | 18%           |
| % with Bodyfat $\geq 95^{\text{th}}$ centile <sup>22</sup>                         | -           | 9%           | 11%           |
| % with Bodyfat $\leq 2^{\text{nd}}$ centile <sup>22</sup>                          | -           | 24%          | 18%           |
| % with Waist Circumference $\geq 90^{\text{th}}$ centile <sup>23</sup>             | -           | 27%          | 34%           |
| % with Waist Circumference $\geq 95^{\text{th}}$ centile <sup>23</sup>             | -           | 24%          | 24%           |
| Mean (sd) BMI                                                                      | 17.6 (2.7)  | 17.5 (2.7)   | 17.8 (2.8)    |
| Mean (sd) % Bodyfat                                                                | 19.7 (6.7)  | 17.7 (6.4)   | 21.8 (6.5)    |
| Mean (sd) Waist Circumference (cm)                                                 | 62.3 (6.8)  | 62.6 (6.5)   | 62.3 (6.8)    |
| <b>Food Intake*(sd)</b>                                                            |             |              |               |
| Energy Dense Snacks (EDS)                                                          | 4.15 (2.1)  | 4.02(2.1)    | 4.30 (2.0)    |
| Healthy Snacks (HS)                                                                | 3.35 (1.6)  | 3.29 (1.8)   | 3.41 (1.5)    |
| Positive Food Markers (PM)                                                         | 7.45 (3.1)  | 7.34 (3.0)   | 7.56 (3.2)    |
| Negative Food Markers (NM)                                                         | 6.77 (3.2)  | 6.72 (3.1)   | 6.81 (3.2)    |
| <b>TV/screen viewing (mean hours/day)</b>                                          |             |              |               |
| TV viewing                                                                         | 2.6 (1.6)   | 2.49 (1.6)   | 2.7 (1.6)     |
| % with TV in bedroom                                                               | 54%         | 55%          | 53%           |
| % with no rules re TV/screen                                                       | 51%         | 52%          | 46%           |
| <b>Physical activity (mean time/day)</b>                                           |             |              |               |
| Moderate-Vigorous PA/day (mins)                                                    | 43 (17.8)   | 49.65 (17.0) | 37.06 (16.5)  |
| Sedentary Activities/day (hours)                                                   | 16.2 (1.8)  | 16 (1.7)     | 16.4 (2.0)    |

\*Refers to the number of different EDS/HS/PM/NM consumed in a day

Figure 1: Phase 1 – Development study (2005-2006).

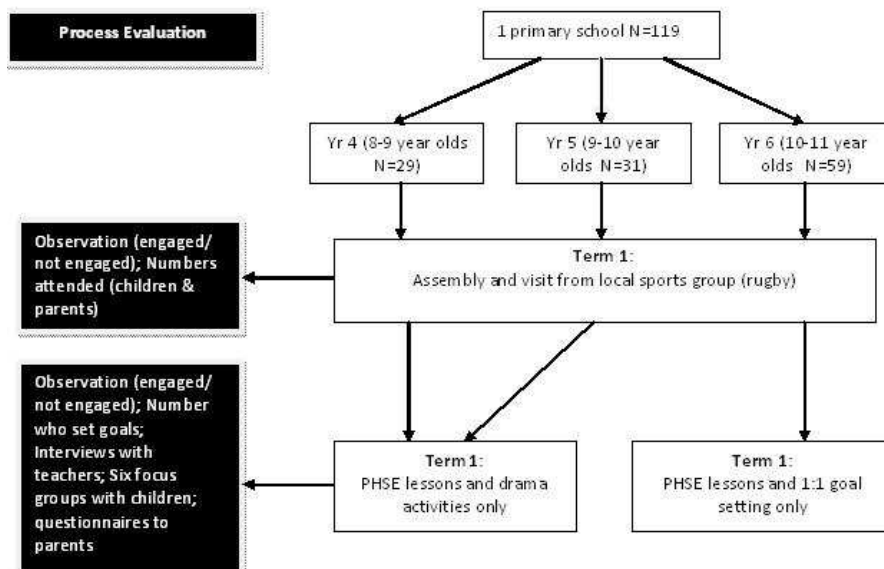

Figure 1  
184x138mm (96 x 96 DPI)

1  
2  
3  
4  
5  
6  
7  
8  
9  
10  
11  
12  
13  
14  
15  
16  
17  
18  
19  
20  
21  
22  
23  
24  
25  
26  
27  
28  
29  
30  
31  
32  
33  
34  
35  
36  
37  
38  
39  
40  
41  
42  
43  
44  
45  
46  
47  
48  
49  
50  
51  
52  
53  
54  
55  
56  
57  
58  
59  
60

Figure 2: Phase 2 – 'Proof of concept' study (2006-2007)

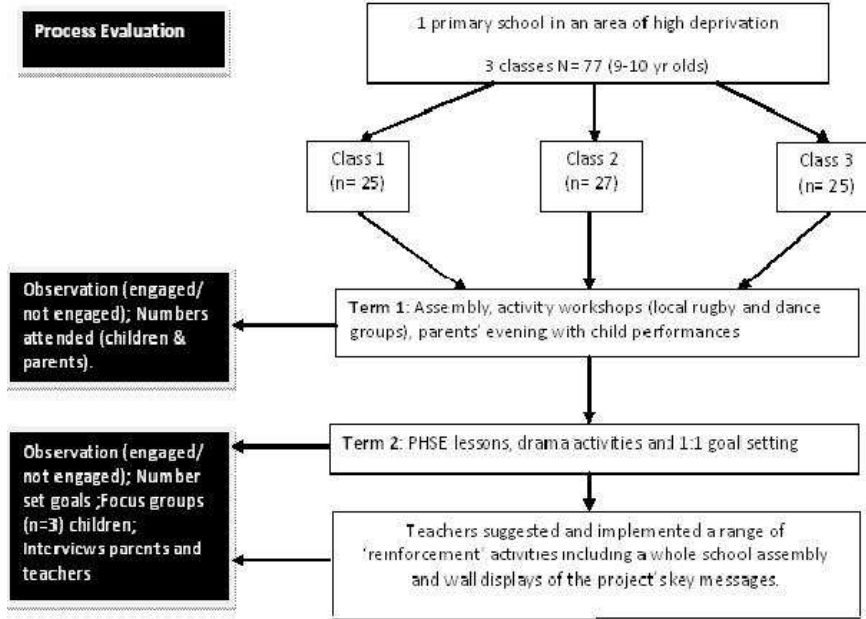

Figure 2  
184x138mm (96 x 96 DPI)

Review only



Figure 3: Phase 3 – Exploratory trial 2008-2011

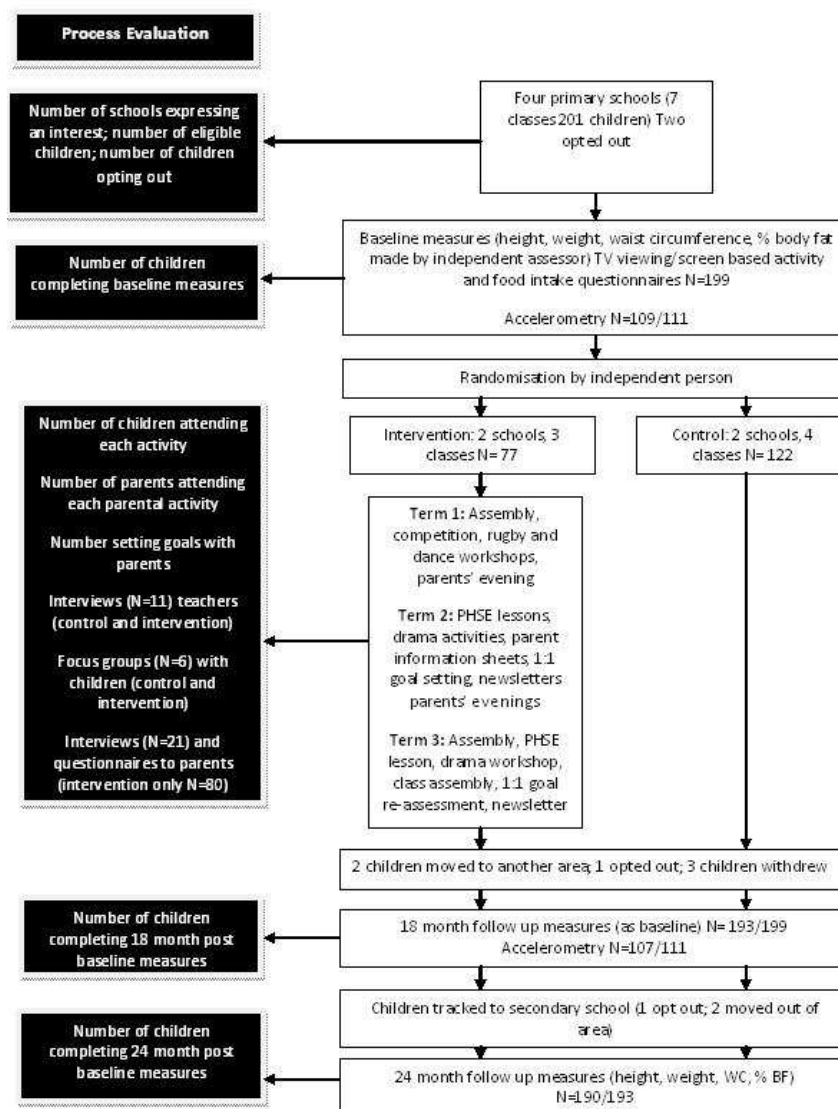

184x214mm (96 x 96 DPI)

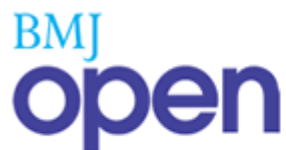

**The development, feasibility and acceptability of a school-based obesity prevention programme: Results from three phases of piloting.**

|                               |                                                                                                                                                                                                                                                                              |
|-------------------------------|------------------------------------------------------------------------------------------------------------------------------------------------------------------------------------------------------------------------------------------------------------------------------|
| Journal:                      | <i>BMJ Open</i>                                                                                                                                                                                                                                                              |
| Manuscript ID:                | BMJ Open-2010-000026.R1                                                                                                                                                                                                                                                      |
| Article Type:                 | Research                                                                                                                                                                                                                                                                     |
| Date Submitted by the Author: | 09-Mar-2011                                                                                                                                                                                                                                                                  |
| Complete List of Authors:     | Lloyd, Jennifer; Peninsula College of Medicine and Dentistry, Institute for Health Service Research<br>Wyatt, Katrina; Peninsula College of Medicine and Dentistry<br>Creanor, Siobhan; University of Plymouth<br>Logan, Stuart; Peninsula College of Medicine and Dentistry |
| <b>Subject Heading</b>:       | Public health                                                                                                                                                                                                                                                                |
| Keywords:                     | Child, Obesity, Intervention, Feasibility Study, Health Behaviours, Exploratory trial                                                                                                                                                                                        |
|                               |                                                                                                                                                                                                                                                                              |

SCHOLARONE™  
Manuscripts

1  
2 The development, feasibility and acceptability of a school-based obesity prevention  
3 programme: Results from three phases of piloting.  
4  
5  
6

7 Katrina M Wyatt<sup>1</sup> \*Jennifer J Lloyd<sup>1</sup> Siobhan Creanor<sup>2</sup> Stuart Logan<sup>3</sup>  
8

9 <sup>1,3</sup>Institute for Health Service Research, Peninsula College of Medicine and Dentistry, University  
10 of Exeter, Exeter, UK  
11

12 <sup>2</sup>Centre for Health & Environmental Statistics, University of Plymouth, Plymouth, UK  
13

14 Email addresses:  
15

16 \*JLL: [jennifer.lloyd@pms.ac.uk](mailto:jennifer.lloyd@pms.ac.uk)  
17

18 KMW: [katrina.wyatt@pms.ac.uk](mailto:katrina.wyatt@pms.ac.uk)  
19

20 SC: [siobhan.creanor@plymouth.ac.uk](mailto:siobhan.creanor@plymouth.ac.uk)  
21

22 SL: [stuart.logan@pms.ac.uk](mailto:stuart.logan@pms.ac.uk)  
23  
24  
25  
26  
27

28 \*Corresponding author: Tel: 01392 722972 Fax: 01392 421009  
29

30 The Corresponding Author has the right to grant on behalf of all authors and does grant on  
31 behalf of all authors, an exclusive licence (or non-exclusive for government employees) on a  
32 worldwide basis to the BMJ Publishing Group Ltd and its Licensees to permit this article (if  
33 accepted) to be published in Archives of Disease in Childhood and any other BMJ PGL products  
34 to exploit all subsidiary rights, as set out in our licence  
35  
36  
37  
38  
39

40 Key words: Child, obesity, intervention, feasibility study, health behaviours, exploratory trial  
41

42 Word count: 3,733  
43  
44  
45  
46  
47  
48  
49

**ABSTRACT**

**Objectives:** To develop a school-based obesity prevention programme and evaluate the feasibility and acceptability of the intervention and the planned definitive cluster randomized trial.

**Design:** Three stage pilot involving six schools (398 children) in Southwest England, including an exploratory randomised controlled trial and qualitative interviews and focus groups with teachers, parents and children.

**Intervention:** The Healthy Lifestyle Programme uses a range of school-based activities including lessons, assemblies, parents' evenings, interactive drama workshops and goal setting to engage schools, children and their families.

**Results:** Of the 398 eligible children in the three pilot phases, only four opted out and a further three children withdrew from the exploratory trial. In the exploratory trial, baseline measures (anthropometric and behavioural) were obtained for 202/204 eligible children in 4 schools and both 18 and 24 month outcome measures for 193/204 participants and 187/204 respectively. Qualitative data show that delivery of the intervention is feasible within schools and acceptable to teachers, children and families. In the exploratory trial 18/80 children (24%) in the intervention schools and 31/122 (26%) in the control schools were overweight or obese at baseline, increasing, at 18 months follow up, to 38/119 (32%) in the control schools compared with 18/74 (24%) in the intervention schools. At 24 months the proportion of overweight and obese children in the control schools remained at 32% (36/114) whereas the proportion in the intervention schools decreased slightly to 22% (16/73).

**Comment [j1]:** Response to reviewer  
3. Comment 3.3

1  
2 **Conclusion:** The Healthy Lifestyle Programme is feasible to deliver and acceptable to schools,  
3  
4 children and their families. We recruited, retained and obtained outcome measures from 92%  
5  
6 of eligible children in the exploratory trial, including measures taken after transition to  
7  
8 secondary school, suggesting that a definitive trial is likely to be deliverable.  
9

#### 10 11 **Article focus**

- 14 • To show the development and evaluation of a novel school-based obesity prevention  
15 programme through 3 detailed stages of piloting  
16  
17
- 18 • To present evidence for the feasibility and acceptability of the HeLP Programme for  
19 schools, children and their families  
20  
21
- 22 • To present the evidence of the feasibility of the trial design and outcome measures  
23 through an exploratory trial involving 4 schools and 202 children.  
24  
25  
26  
27

#### 28 29 **Key messages**

- 30  
31 • The HeLP Programme has been systematically developed and uses drama based  
32 activities to engage the school, children and their families in healthy lifestyle messages  
33 and activities  
34  
35
- 36 • The Programme has been piloted in six schools involving 398 children and results  
37 suggest that it is acceptable and feasible to schools, children and their families  
38  
39
- 40 • Results from the pilot phases have provided sufficient evidence to support the  
41 evaluation of the HeLP intervention in a full scale trial  
42  
43  
44  
45  
46  
47  
48

## Strengths and Limitations

Strengths: The HeLP intervention has undergone a systematic development process using research evidence, behavioral theory, stakeholder consultation and piloting. This has enabled the researchers to gain a deeper understanding of the context in which the intervention was to be delivered in order to maximize engagement at all levels. Preliminary results suggest the Programme may affect behaviours associated with overweight and obesity.

Limitations: Interviews and focus groups were carried out by the lead researcher who had built up a relationship with the schools, children and their families. This may have affected responses as the participants might not have wanted to express negative opinions. However, the ongoing support and retention of the schools and children would suggest that if there was such an effect, it was a very slight one. Piloting has taken place in schools in varying socioeconomic areas; and although, there is a limited ethnic mix of children in the South West of England, the drama framework has been specifically developed to allow flexibility and adaptation to ensure it is recognizing and responding to the needs of the children receiving it.

**Comment [j2]:** In response to comment from Reviewer 1.Comment 1.9

## Background

There has been a substantial increase in the proportion of children in the UK who are overweight. The Health Survey for England (2007) reported that 19% of girls and 18% of boys aged 11-15 were obese and 34% of girls and boys were overweight or obese [1]. The National Child Measurement Programme (2008/2009) reported that by age 10-11 years, school year 6, nearly one in three children in England were either overweight or obese [2]. Being overweight in childhood is associated with adverse consequences including metabolic abnormalities, increased risk of Type II diabetes, and musculo-skeletal and psychological problems [3]. Over 50% of obese children become obese adults [4] with significant health consequences [5].

Obesity results from an imbalance between consumption and expenditure of energy. Epidemiological studies suggest a number of risk factors, the strongest of which is having one or more overweight parents [6] and there are also strong associations, between the risk of overweight and socio-economic status, diet, physical activity levels and other lifestyle factors [7]. At a population level, the consumption of processed and fast food, including sweetened fizzy drinks, has increased while that of fruit and vegetables has declined and portion size in pre-packaged food has increased substantially [8].

The association with overweight and obesity and physical activity remains contested, with cross sectional studies showing a reduction in levels and intensity of physical activity in children and an increase in % body fat [9]. Longitudinal studies are scarce, although recent data suggests that fatness leads to a reduction in physical activity rather than the other way round [10]. Some studies have reported an association between time spent watching television and obesity [11].

1  
2 Not only is television viewing a sedentary activity but it is also positively correlated with total  
3  
4 calorific intake [12] and the consumption of snack foods [13].  
5  
6

7 More recently community wide approaches to preventing and reducing obesity in children are  
8   
9 being developed and evaluated [14, 15]. These initiatives take a multistrategy, multisite  
10  
11 approach with school-based interventions forming part of the overall programme of events  
12

**Comment [j3]:** Added in response to reviewer 1, comment 1.7 and reviewer 2, comment 2.2

13  
14 The most recent systematic review (2008) of controlled trials of school-based interventions  
15  
16 concluded that interventions which increase activity and reduce sedentary behaviour may help  
17  
18 children to maintain a healthy weight, although results were short-term and inconsistent [16].  
19  
20 The review also reported that trials of dietary interventions also produced inconsistent results,  
21  
22 although the reviewers suggest that a combined approach may be more effective in preventing  
23  
24 children becoming overweight in the long term.  
25  
26

27  
28 The Healthy Lifestyle Programme (HeLP) is a school-based intervention which seeks to deliver  
29  
30 healthy lifestyle messages and provide simple individually-tailored strategies to assist change  
31  
32 relating to healthy activity and eating. HeLP takes a population approach seeking to change  
33  
34 behaviour at a family as well as at an individual and institutional level. The development of  
35  
36 HeLP followed the MRC guidance for the development and evaluation of complex interventions  
37  
38 [17]. This paper reports on the iterative development and refinement of HeLP, in accordance  
39  
40 with the 'development' and the 'feasibility and piloting' processes of the MRC framework, and  
41   
42 presents results from, an initial development phase, a 'proof of concept' phase and an  
43  
44 exploratory trial.  
45

**Comment [j4]:** Section strengthened in response to comments by reviewer 1, comment 1.9



## Development, feasibility and piloting methods

The intervention was developed using an Intervention Mapping protocol [18] utilising research evidence, behavioural theory, extensive stakeholder consultation and piloting to develop key behavioural objectives for each target group (teachers, children and parents) and specific intervention techniques and strategies that linked directly to them. HeLP aims to deliver a general healthy lifestyle message relating to the energy balance and within this context, three evidence-based key messages are emphasised: a decrease in the consumption of sweetened fizzy drinks; an increase in the proportion of healthy snacks consumed and a reduction in TV viewing and other screen-based activities. These messages are consistent with the strategies suggested in the NICE guidance [19]. As a means of communicating these messages in a simple and easy to remember way we used a logo of '80/20', suggesting we should aim to eat healthily and be active 80% of the time. We hypothesised that this approach would enable children and their families to negotiate and have control over the choices they make; an important consideration in behaviour change [20]. Process evaluation methods during all three phases included semi structured interviews with staff and parents, focus groups with children, questionnaires responses from children and parents, documentation of child, parental and staff involvement and observation of intervention delivery.

**Comment [j5]:** Additional detail provided in response to Reviewer 1, comment 1.2

**Comment [j6]:** Additional detail provided in response to Reviewer 1 comment ,1.2 and reviewer 3, comments 3.5 and 3.6

*Phase 1 - Assess range of delivery methods for key objectives identified in the intervention mapping process (2005-2006; One school; n=119 children, aged 8-11)*

We worked with children, parents and teachers from a single primary school to try candidate behaviour change approaches for different age groups. We delivered healthy lifestyle messages

1  
2  
3  
4  
5  
6  
7  
8  
9  
10  
11  
12  
13  
14  
15  
16  
17  
18  
19  
20  
21  
22  
23  
24  
25  
26  
27  
28  
29  
30  
31  
32  
33  
34  
35  
36  
37  
38  
39  
40  
41  
42  
43  
44  
45  
46  
47  
48  
49  
50  
51  
52  
53  
54  
55  
56  
57  
58  
59  
60

to three age groups, 8-9 year olds; 9-10 year olds and 10-11 year olds, using lessons and either interactive drama activities or goal setting (figure 1). Six focus groups (two for each year group, n=33) were held with the children to ascertain views on activities and what messages and concepts they remembered. Children whose parents consented to the focus groups were randomly selected to participate. Semi-structured interviews were held with teachers (n=6) and parents were invited to complete a questionnaire about the study.

**Comment [j7]:** Further detail on numbers involved in the focus groups. Response to Reviewer 3, comment 3.1 and 3.5.

*Phase 2 – Proof of Concept - Pilot of intervention and outcome measures (2006-2008; One school; n=77 children, aged 9-10)*

Based on the results from the first phase, the intervention was further developed (figure 2) and evaluated in a second primary school, in an area of high social deprivation, with three Year 5 classes. Baseline and 6 week post-intervention height, weight, waist circumference, % body fat, objective physical activity, food intake and TV viewing/screen based activity were assessed. Food intake was assessed using the adapted version of the Food Intake Questionnaire (FIQ) [21], an adapted recall method which asks whether specific foods were consumed the previous day. Children completed the FIQ twice in order to obtain a weekday and weekend food intake. TV viewing/screen based usage was assessed using the adapted version of the Children's TV Viewing Habits Questionnaire [22]. To assess physical activity, children were asked to wear a GT1M Actigraph (Actigraph LLC, Pensacola, FL <http://www.theactigraph.com>) during waking hours over seven consecutive days (5 weekdays and one weekend). Two focus groups (a total of 14 children) were held with children who 'engaged fully' (defined by enthusiasm for the study, desire to set and maintain goals) and a further focus group with those who appeared

Deleted:

1  
2 'indifferent' (reluctant to take part in activities, needed several prompts regarding goals or did  
3  
4 not want to set goals) to the study and the messages (n=4). Interviews were held with the staff  
5  
6 (n=3) and head teacher (n=1) and parents of the children (n=5). Parents were also invited to  
7  
8 complete a questionnaire about the study.  
9

**Comment [j8]:** Additional information provided regarding the focus group. Response to Reviewer 3, comments 3.1, 3.5 and 3.10.

10  
11 *Phase 3 - Exploratory randomised controlled trial (2008-2010; 4 schools (7 classes); n=204*  
12  
13 *children, aged 9-10)*

14  
15  
16 Phase 3 sought to assess, for schools, children and their families: recruitment and retention in  
17  
18 control and intervention schools; feasibility and acceptability of the HeLP intervention and of  
19  
20 future trial outcome measures and facilitators and barriers to the uptake of the intervention. All  
21  
22 state Primary schools in Exeter were eligible to take part if they had at least one single age year  
23  
24 5 group (i.e. not year 4/5 or 5/6 mixed classes). Schools were recruited via the Devon  
25  
26 Association of Primary Head teachers. Baseline height, weight, waist circumference, % body fat,  
27  
28 food intake, TV viewing/screen-based activity and physical activity (as in phase 2) were  
29  
30 collected prior to randomization (two control and two intervention schools). These same  
31  
32 measures were then collected 18 months post baseline and anthropometric measures only  
33  
34 were collected at 24 months post baseline which involved tracking the children to their  
35  
36 secondary school (figure 3). All anthropometric measures at each time point were taken by an  
37  
38 independent assessor blind to allocation. Six focus groups across the 4 schools (a total of 38  
39  
40 children) were carried out from a selection of children whose parents gave consent (groups  
41  
42 were purposefully sampled to reflect gender mix and weight status) and semi structured  
43  
44

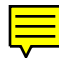

1  
2 interviews were conducted with staff (n=9) and parents (n=17) in control and intervention  
3  
4 schools.  
5  
6  
7  
8  
9  
10  
11  
12  
13  
14  
15  
16  
17  
18  
19  
20  
21  
22  
23  
24  
25  
26  
27  
28  
29  
30  
31  
32  
33  
34  
35  
36  
37  
38  
39  
40  
41  
42  
43  
44  
45  
46  
47  
48  
49  
50  
51  
52  
53  
54  
55  
56  
57  
58  
59  
60

**Comment [j9]:** Additional information provided regarding the focus group. Response to Reviewer 3, comments 3.1, 3.5 and 3.10.

For peer review only

## RESULTS

**Phase 1:** Of the 120 children invited to participate, only one child opted out (Figure 1).

**Us**  **ws:** Many parents reported in the questionnaire positive parent/family behaviour changes and qualitative data from teachers, children and their parents suggested that Year 5s (9-10 year olds) were more receptive to the messages and more able and willing than the year 4s and 6s to translate them into possible behaviour changes. In addition, it appeared that this year group engaged their families to the greatest extent. Teachers thought that the education lessons should be taught consecutively over one week to maintain momentum and that the drama and goal setting had the potential to work synergistically by engaging the children through the drama and following this up with encouraging the children, with their parents support, to make changes through setting simple goals. Parents and children also highlighted the need for a greater variety of activities to introduce the key messages and concepts in order to engage both boys and girls.

**Implications:** In order to build a trusting relationship, a range of activities were developed to introduce the school, children and their families to the project's key messages. A 'Healthy Lifestyles Week' was developed consisting of education lessons in the morning (delivered by teachers) which dovetailed with interactive drama activities in the afternoon (delivered by a local drama group). In order to guide the sequential development of the intervention components across the school year, key performance objectives, developed using an intervention mapping process [23], were mapped onto the Health Action Process Model (HAPA) of behaviour change that suggests behaviour change occurs through a sequence of adoption

1  
2 (establish motivation), initiation (take action) and maintenance (stay motivated) processes [24].

3  
4 The intervention components at this stage of development were: creating a receptive  
5  
6 environment, a healthy lifestyles week and goal setting with year 5 children (9-10 year olds) as  
7  
8 the target group. |

**Comment [j10]:** More detail provided on the outcome of each phase and the implications for the subsequent phase. Response to reviewers 1, comment 1.1 and 1.3 and reviewer 3, comment 3.2.

9  
10  
11 **Phase 2:** No child opted out (figure 2) and no adverse events (e.g. child feeling stigmatised)  
12  
13 were reported by parents, teachers or children in questionnaires, focus groups or individual  
14  
15 discussions. Self-report questionnaires and accelerometry data from the children suggested  
16  
17 changes with respect to snacking and sedentary behavior.  
18

19  
20  
21 *User views:* Staff were enthusiastic about the Programme, in part because it met the National  
22  
23 Curriculum guidelines for Personal Social Health Education (PHSE) and Citizenship, and  
24  
25 importantly because they felt it promoted families' engagement with the school. Some teachers  
26  
27 felt that the drama had a positive effect on the self esteem of the children, particularly those  
28  
29 with additional learning needs. Some teachers suggested further activities for the subsequent  
30  
31 term to reinforce the messages and refocus the children and their parents on their goals. Many  
32  
33 parents reported that their family had made lifestyle changes and that their child was willing to  
34  
35 try new foods. The children enjoyed the drama activities and felt that they could relate to the  
36  
37 characters within the drama framework who made them more motivated to set their own  
38  
39 goals. Some children reported that they had started going to more after school clubs.  
40

41  
42 *Implications:* An additional component was added to the intervention - 'reinforcement  
43  
44 activities' to take place at the beginning of year 6, to motivate children to stick to their goals. In  
45  
46 addition, minor refinements were made to the education lessons and the drama scripts to  
47  
48

1  
2 enhance delivery and continuity. Table 1 shows the final intervention components, how they  
3  
4 relate to the HAPA model with their associated methods and agents of delivery. |

**Comment [j11]:** More detail provided on the outcome of each phase and the implications for the subsequent phase. Response to reviewers 1, comment 1.1 and 1.3 and reviewer 3, comment 3.2.

5  
6  
7 **Phase 3:** Eight schools expressed an interest in participating in this exploratory trial and four  
8  
9 schools were randomly selected to take part.

### 10 11 **Feasibility data**

12  
13  
14  
15 Of the 204 children eligible to participate, two opted out of the study (figure 3). Baseline  
16  
17 anthropometric measures, food intake and TV viewing/screen based activity were recorded for  
18  
19 202 children. We measured physical activity, using accelerometry, from one randomly selected  
20  
21 class in each of the 4 participating schools. Measures were successfully obtained from 109/111  
22  
23 with 95% (104/111) of children providing useable data (3 good weekdays and one weekend  
24  
25 day). Prior to the 18 month post baseline measures, five (2 control and 3 intervention) children  
26  
27 had left the area and one child opted out (control school). Three girls in the same intervention  
28  
29 school withdrew prior to the 18 month measures being collected; this coincided with the  
30  
31 children being given a simple snacking and activity diary to complete over a 2 week period and  
32  
33 feedback (teacher and parents) suggested this focused the girls too much on what they were  
34  
35 eating and their parents felt they were restricting certain food groups.  
36  
37  
38  
39  
40

41 Eighteen month post baseline measures were collected from 193/204 children, with 107/111  
42  
43 children providing accelerometry data of which 85% (95/111) was useable. At collection of the  
44  
45 twenty four month anthropometric data, one girl (control school) did not want to be measured  
46  
47  
48  
49  
50

and five children (3 control, 2 intervention) had moved out of the area, therefore data was obtained from 187/204 children, 92% of the original cohort.

### Summary of anthropometric baseline data from the exploratory trial

In the intervention schools, 24% (18/80) of children were classified as overweight or obese compared to 26% (31/122) in the control schools. One child (intervention school) was classified as being underweight [25]. Mean BMI was 17.6 (2.7) (95% CI 17.27 to 18.02). Almost 20% (39/202) had a % body fat  $\geq$  the 85<sup>th</sup> centile [26] and 43% (86/202) had a waist circumference  $\geq$  the 85<sup>th</sup> centile [27]. Table 2 summarizes child demographics and BMI status for the two groups.

### Process evaluation of the Exploratory Trial

All children (n=80) in the intervention schools participated in the healthy lifestyle week and 90% set goals with their families around lifestyle change. Seventy five percent of parents participated in one or more programme activity.

*User Views:* Parents were adamant their children's diet and activity choices were their responsibility but felt school was a good place to reinforce these messages. Parents reported a greater acceptance of rules relating to screen-time and healthy eating in their child as well as initiating discussion with other family members around healthy lifestyles.

Teachers agreed year 5 was the right target group as children are gaining independence whilst still amenable to the messages. Some commented that the intervention had boosted the children's self-esteem, had a positive effect on the class socially and created additional

**Comment [j12]:** Amended in response to reviewer 1, comment 1.5.

**Comment [j13]:** Deleted in response to reviewer 1, comment 1.6

**Deleted:** *Food intake:* The Food Intake Questionnaire data suggested that children consumed a mean of 4.2 (95% CI 3.85 to 4.44) different energy dense snacks (EDS) per day and a mean of 3.4 (95% CI 3.12 to 3.58) healthy snacks (HS). The mean number of different positive and negative food markers consumed each day was 7.5 (95% CI 7.02 to 7.89) and 6.8 (95% CI 6.32 to 7.22) respectively. ¶  
*TV viewing:* Children's TV Viewing Habits questionnaire showed that mean daily time spent watching TV was 2.6 hours (95% CI 2.36 to 2.83). Fifty four percent of children had TVs in their bedrooms and 51% had no rules at home regarding the amount of TV/screen-based media they could watch/use. ¶  
*Physical activity:* Daily mean time spent in moderate to vigorous physical activity (MVPA) and sedentary activity was 44 minutes (95% CI 40.13-47.08) and 16 hours (95% CI 15.8 to 16.5) respectively

**Deleted:** . ¶



1  
2 opportunities to link with parents. Teachers felt using young actors to deliver the messages was  
3  
4 the key to achieving engagement with this age group.  
5

6  
7 Children were unanimous in their enjoyment of the drama activities and equally unequivocal  
8  
9 that these activities should be carried out by people external to the school. They did not  
10  
11 comment on the weighing and measuring and when this was brought up in the focus groups,  
12  
13 dismissed it as 'fine'. The key message the children remembered was the importance of  
14  
15 replacing unhealthy snacks with more healthy alternatives and replacing screen-based activities  
16  
17 with more active pursuits which they enjoy.  
18  
19

20 *Implications:* Following the withdrawal of 3 girls from an intervention class, the snacking and  
21  
22 activity diary activity has been withdrawn from component 4 (reinforcement activities). The  
23  
24 education lessons were refined to include more self monitoring activities for the children within  
25  
26 the school and home environment in order keep the children focused on their goals in year 6.  
27  
28

**Comment [j14]:** Detail provided on the the implications from the exploratory trial Response to reviewers 1, comments 1.1 and 1.3 and reviewer 3, comment 3.2

29  
30 *Summary of 18 and 24 month post baseline anthropometric data from the Exploratory trial*

31  
32 At 18 months, the proportion of overweight and obese children increased in the control schools  
33  
34 from 26% (31/122) to 32% (38/119) but remained at 24% (18/74) in the intervention schools. At  
35  
36 24 months the proportion of overweight/obese children remained at 32% (36/114) in the  
37  
38 control schools and decreased slightly to 22% (16/73) in the intervention schools. Other  
39  
40 anthropometric data and the results from the questionnaires and accelerometry will be  
41  
42 reported elsewhere. **DISCUSSION**  
43  
44  
45

**Comment [j15]:** Substantial rewrite based on comments by reviewer 1 and 2 and 3.

**Deleted: 1**

1  
2 To date the evidence base for effective interventions to prevent and reduce childhood obesity  
3  
4 is limited but suggests that a multi-component approach, addressing both sides of the energy  
5  
6 balance and engaging families as well as the children, is more likely to be effective [16]. Using  
7  
8 an intervention mapping protocol [18, 23] involving literature reviews, extensive stakeholder  
9  
10 consultation, expert workshops and three stages of piloting, we have created a programme of  
11  
12 activities to engage and change behaviours at a school, child and family level. Such an  
13  
14 intervention could also form part of a wider community approach to tackling obesity such as  
15  
16 the programmes described in 'Romp and Chomp' and 'Being Active, Eating Well' [15, 14]. Unlike  
17  
18 previous school-based interventions [18, 29], HeLP activities have been ordered to promote and  
19  
20 support behaviour change in children and their families using the HAPA model [24]. Component  
21  
22 1 seeks to establish motivation and create a receptive context for the 'Healthy Lifestyles Week'  
23  
24 (component 2). This component seeks to further motivate the children by building their  
25  
26 confidence and skills and helping them make decisions. We worked closely with a local theatre  
27  
28 company to design a drama framework built around 4 characters, each played by one of the  
29  
30 actors whose attributes relate to our healthy lifestyle messages. Children have to choose which  
31  
32 character they most resemble and then work with that character to help them change their  
33  
34 behaviour. The actors became role models as they worked with the children in a range of  
35  
36 interactive activities such as food tasting, making adverts, looking at ingredients and role play.  
37  
38 The rationale for using the drama and the young actors as role models was to enthuse the  
39  
40 children so much that they took the messages home to their parents and families and, crucially,  
41  
42 encouraged them to come into the school and engage with the Programme. Previous research  
43  
44 has suggested that low income parents may be more likely to attend an event in which their  
45  
46  
47  
48

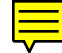

**Comment [j16]:** Added in response to reviewer 2, comment 2.4.

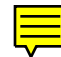

1  
2 children are participants than an educational event, (e.g. eating and joint parent-child classes)  
3  
4 [30]. Qualitative data revealed that the dynamic nature of the drama and the use of the young  
5  
6 actors did indeed engage the children to such an extent that they talked exuberantly about the  
7  
8 Programme with their parents and siblings and encouraged them to attend events, particularly  
9  
10 if they were going to be performing with the actors. Interestingly, it was the year 5s (9-10 year  
11  
12 olds) who were best able to engage their families and translate the messages into possible  
13  
14 behavior change which is why we decided to focus on this age group in subsequent pilots. The  
15  
16 role play activities allowed us to teach the children how to communicate the healthy lifestyle  
17  
18 messages to their family and seek their support in a subtle and positive manner. Component 3  
19  
20 moves the children on to helping them create an action plan and implement their goals with  
21  
22 the support of their parents and component 4 helps them to remain motivated by delivering a  
23  
24 range of reinforcement activities to monitor, assess and adapt their goals. Full details of each  
25  
26 intervention component and their associated behaviour change techniques and methods of  
27  
28 delivery are reported elsewhere [23].  
29  
30

**Comment [j17]:** Added in response to reviewer 1, comment 1.7 and reviewer 3, comment 3.7 and 3.9.

31  
32 One of the aims of the intervention was to explicitly affect the whole school environment by  
33  
34 engaging all staff using staff meetings, whole school assemblies, competitions and parents  
35  
36 evenings. During the Healthy Lifestyles Week, the year 5 teachers delivered the pre prepared  
37  
38 education lessons in the morning and then observed the theatre company deliver the  
39  
40 interactive drama activities in the afternoon. Feedback from interviews and informal  
41  
42 discussions with the teachers suggested that the observation of the drama led to an increase in  
43  
44 their understanding and motivation which, in turn, led to greater support for, and involvement  
45  
46 in, the Programme. After pilot 2, teachers and the head developed further activities relating to  
47  
48

1  
2 the healthy lifestyle messages after we had trialled the original ideas, which lead to the addition  
3  
4 of component 4. The HeLP intervention has been specifically designed so that it can be adapted  
5  
6 for use in different types of schools, increasing its generalisability, whilst still remaining  
7  
8 standardized enough to maintain fidelity. The activities within the Prograame dovetail with the  
9  
10 National Curriculum objectives for this age group. The drama framework is based around 4  
11  
12 characters with whom the children identify and these can be adapted for schools in a variety of  
13  
14 different settings. In addition, the children drive the drama scenes as this is key to engagement  
15  
16 and encouraging ownership of the healthy lifestyle messages. HeLP has been piloted in a range  
17  
18 of schools with children from different socio-economic groups and we have found no difference  
19  
20 in the levels of engagement and parental involvement. One limitation, however, is that there is  
21  
22 little ethnic mix in schools in Exeter, but we would argue that the drama framework can be  
23  
24 adapted to accommodate this.  
25  
26

**Comment [j18]:** Amended in response to reviewer 3, comment 3.4

**Comment [j19]:** Amended in response to reviewer 1, comment 1.8 and reviewer 3, comment 3.4.

**Comment [j20]:** Added in response to reviewer 1, comment 1.8.

27  
28 As well as seeking to develop a novel and adaptable intervention that engages schools, children  
29  
30 and their families we sought to determine whether our proposed trial design and outcome  
31  
32 measures are feasible and acceptable for schools as well as individual children and their  
33  
34 families. The baseline anthropometric data from Phase 3 is very similar to national figures  
35  
36 reported in the Health Survey for England (2007) and the National Child Measurement  
37  
38 Programme (NCMP) (2008/9). At 24 months, however, the percentage of overweight and obese  
39  
40 children in the control schools increased by 6%, mirroring the local NCMP data for 10-11 year  
41  
42 olds in Exeter, whilst decreasing by 2% in the intervention schools. Although the exploratory  
43  
44 trial was not powered to detect statistically significant differences between intervention and  
45  
46 control schools, the finding that the proportions overweight and obese remained at baseline  
47  
48

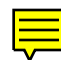

1  
2 levels in the intervention schools is encouraging, particularly in light of recent tracking data  
3  
4 showing that the greatest increases in weight in a non obese sample are between the ages of 7  
5  
6 and 11 years [31].

**Comment [j21]:** Clarified in response to reviewer 2, comment 2.1

7  
8  
9 Using the MRC framework for development and evaluation of complex interventions [17] we  
10  
11 have developed and refined a novel school-based programme to prevent and reduce obesity in  
12  
13 children. We have demonstrated the feasibility and acceptability of the intervention and shown  
14  
15 that it engages children, schools and families. We have also demonstrated that we can recruit  
16  
17 schools and children and collect baseline measures prior to randomisation. Retention of  
18  
19 children has been excellent with very few losses to follow up at secondary school. Results from  
20  
21 these pilot stages have provided us with the necessary and sufficient information to suggest  
22  
23 that the HeLP intervention should now be evaluated in a full-scale trial.  
24

25  
26  
27 **Acknowledgements:** The authors are very grateful to the participating schools, children and  
28  
29 their families who gave up their time for the study. We would also like to acknowledge Sandy  
30  
31 Akerman (Headbangers Theatre Company) who supported the design of the drama component  
32  
33 of the intervention.  
34

35  
36 **Funding:** Phase 1, 2 and 3 of development was funded by the Children's Research Fund  
37  
38 (registered charity no. 226128) and the NIHR Research for Patient Benefit (RfPB) Programme.

39  
40 SL, KW and JL were partially supported by PenCLAHRC, the National Institute for Health  
41  
42 Research (NIHR) CLAHRC for the Southwest Peninsula. This paper presents independent  
43  
44 research commissioned by the National Institute for Health Research (NIHR). The views  
45  
46  
47  
48

1  
2 expressed are those of the author(s) and not necessarily those of the NHS, the NIHR or the  
3  
4 Department of Health.  
5  
6

7 **Competing interests:** None  
8  
9

10 **Ethics approval:** Ethical approval for each phase of the development and evaluation of the HeLP  
11  
12 intervention was granted from the Peninsula College of Medicine and Dentistry Ethics  
13  
14 Committee. This followed an approach to the NHS ethics committee who felt the study did not  
15  
16 fall within their remit.  
17  
18

19 **Author contribution:** JL and KW drafted the manuscript with SC and SL providing critical  
20  
21 revision. JL developed and supported the design and production of the intervention materials,  
22  
23 coordinated the implementation of the intervention during pilot phases and conducted  
24  
25 interviews with teachers and parents. JL and KW conducted the focus groups and with SL  
26  
27 designed the study and obtained funding. KW will act as guarantor of the paper.  
28  
29  
30  
31  
32  
33  
34  
35  
36  
37  
38  
39  
40  
41  
42  
43  
44  
45  
46  
47  
48  
49  
50  
51  
52  
53  
54  
55  
56  
57  
58  
59  
60

### What is already known on this topic

There is little good quality evidence that existing interventions are effective in preventing and reducing childhood obesity.

Interventions which aim to affect both diet and activity seem to show more promise than those targeting either alone.

### What this study adds

The Healthy Lifestyle Programme uses behavioural theory and novel interactive delivery mechanisms to create the conditions to enable and support sustainable changes in behaviour for children and their families.

The Healthy Lifestyle Programme is feasible to deliver within the context of the National Curriculum at Key Stage 2 and acceptable to children, their families and schools.

**Comment [j22]:** Further developed in response to reviewer 2, comment 2.3.

The intervention package engages staff, children and families and preliminary results suggest the possibility that it may affect behaviours associated with overweight and obesity.

The high levels of recruitment, retention and collection of outcome measures in the exploratory trial suggest that a definitive trial is deliverable.

## References

- [1] **Health Survey for England 2007**. Children's BMI, overweight and obesity. NHS The Information Centre. [www.ic.nhs.uk/webfiles/publications/HSE07/](http://www.ic.nhs.uk/webfiles/publications/HSE07/)
- [2] **National Child Measurement Programme**: results from the school year 2008/09 NHS Centre for Information in Health and Social Care 2009.
- [3] **Gunnell DJ**, Frankel SJ, Nanchahal K, Peters TJ, Davey Smith G. Childhood obesity and adult cardiovascular mortality: a 57-y follow-up study based on the Boyd Orr cohort. *Am J Clinical Nutrition* 1998; **67(6)**:1111.
- [4] **Serdula MK**, Ivery D, Coates RJ, Freedman DS, Williamson DF, Byers T. Do obese children become obese adults? A review of the literature. *Prev Med* 1993; **22(2)**:167-177.
- [5] **Choi BC, Hunter DJ**, Tsou W, Sainsbury P. Diseases of comfort: primary cause of death in the 22nd century. *J Epidemiol Community Health*. 2005; **59**:1030-4.
- [6] **Lake JK**, Power C, Cole TJ. Child to adult body mass index in the 1958 British birth cohort: associations with parental obesity. *Arch Dis Child* 1997; **77**:376-81
- [7] **Li L**, Law C, Lo Conte R, Power C. Intergenerational influences on childhood body mass index: the effect of parental body mass index trajectories. *Am J Clin Nutr* 2009; **89**: 551-7.
- [8] **Nielsen SJ**, Popkin BM. Patterns and trends in food portion sizes, 1977-1998, *JAMA* 2003;**289**:450-453.
- [9] **Jiménez-Pavón D**, Kelly J, Reilly JJ. Associations between objectively measured habitual physical activity and adiposity in children and adolescents: Systematic review. *Int J Pediatr Obes*. 2010; **5(1)**:3-18.
- [10] **Metcalf BS**, Hosking J, Jeffery AN, Voss LD, Henley W, Wilkin TJ. Fatness leads to inactivity, but inactivity does not lead to fatness: a longitudinal study in children (EarlyBird 45). *Arch Dis Child*. Published online first: 23 June 2010. doi: 10.1136/adc/2009.175927.
- [11] **Marshall SJ**, Biddle SJ, Gorely T, Cameron N, Murdey I: Relationships between media use, body fatness and physical activity in children and youth: a meta analysis. *Int J Obes Relat Met Disord* 2004; **28(10)**:1238-46.
- [12] **Wiecha JL**, Peterson KE, Ludwig DS, Kim J, Sobol A, Gortmaker SL: When children eat what they watch. Impact of television viewing on dietary intake in youth. *Archives of Pediatrics & Adolescent Medicine* 2006; **160**: 436-42.
- [13] **Halford JCG**, Gillespie J, Brown V, Pontin EE, Dovey TM: Effect of television advertisements for foods on food consumption in children. *Appetite* 2004; **42**: 221-5.



1  
2 [14] de Silva-Sanigorski AM, Bolton K, Haby M, Kremer P, Gibbs L, Waters E, Swinburn B. Scaling  
3 up community-based obesity prevention in Australia: background and evaluation design of the  
4 Health Promoting Communities: Being Active Eating Well initiative. *BMC Public Health*.  
5 2010;**10**:65  
6

7 [15] de Silva-Sanigorski AM, Bell AC, Kremer P, Nichols M, Crellin M, Smith M, Sharp S, de Groot  
8 F, Carpenter L, Boak R, Robertson N, Swinburn BA. Reducing obesity in early childhood: results  
9 from Romp & Chomp, an Australian community-wide intervention program. *Am J Clin Nutr*.  
10 2010; **91**(4):831-40.  
11

12 [16] **Brown T**, Summerbell C A systematic review of school-based interventions that focus on  
13 dietary intake and physical activity levels to prevent childhood obesity: an update to the obesity  
14 guidance produced by the NICE. *Obesity Reviews* 2008; **10**:110-141.  
15

16 [17] **Medical Research Council**. A new Framework for the development and evaluation of RCTs  
17 for complex interventions to improve health. London: MRC, 2008.  
18 [www.mrc.ac.uk/complexinterventionsguidance](http://www.mrc.ac.uk/complexinterventionsguidance).  
19

20 [18] **Bartholomew K**, Parcel GS, Kok G, Gottlieb NH: Planning Health Promotion Programmes:  
21 An intervention mapping approach San Francisco: Jossey-Bass, 2006.  
22

23 [19] **NICE**. Obesity: the prevention, identification assessment and management of overweight  
24 and obesity in adults and children. London: NICE, 2006.  
25

26 [20] **Ryan RM.**, Patrick H, Deci EL., & Williams GC. Facilitating health behaviour change and its  
27 maintenance: Interventions based on self-determination theory. *The European Health*  
28 *Psychologist* 2008; **10**:2-5.  
29

30 [21] **Johnson B**, Hackett, AF. Eating habits of 11-14 year old school children living in less affluent  
31 areas of Liverpool, UK. *Journal of Human Nutrition and Dietetics* 1997; **10**:135-144.  
32

33 [22] **Owens J**, Maxim R, McGuinn M, Nobile C, Msall M, Alario A. Television-viewing habits and  
34 sleep disturbance in school children. *Pediatrics* 1999; **104**:e27.  
35

36 [23] **Lloyd J**, Logan S, Greaves C, Wyatt K. Evidence, Theory and Context – Using intervention  
37 mapping to develop a school-based intervention to prevent and reduce obesity in children  
38 *International Journal of Behavioural Nutrition and Physical Activity* 2010 (under review).  
39

40 [24] **Schwarzer, R**: Self-efficacy in the adoption and maintenance of health behaviors:  
41 Theoretical approaches and a new model. In *Self-efficacy: thought control of action* Edited by  
42 Schwarzer R. London: Hemisphere; 1992:217-243.  
43

44 [25] **Cole TJ**, Freeman JV & Preece MA Body mass index reference curves for the UK 1990  
45 *Archives of Disease in Childhood* 1995; **73**:17-24.  
46  
47  
48

1  
2 [26] **McCarthy HD**, Cole TJ, Fry T, Jebb SA & Prentice AM Body fat reference curves for children.  
3 *International Journal of Obesity* 2006; **30**: 598-602.

4  
5 [27] **McCarthy HD**, Jarrett KV, Crawley HF. The development of waist circumference percentiles  
6 in British children aged 5.0-16.9y. *European Journal of Clinical Nutrition* 2001; **55**: 902-907.

7  
8 [28] **James J**, Thomas P, Cavan D, Kerr D. Preventing childhood obesity by reducing  
9 consumption of carbonated drinks: cluster randomised controlled trial. *BMJ*. 2004; **22**: 1237-  
10 1239.

11  
12 [29] **Taylor RW**, Mcauley KA, Williams SM, Barbezat W, Nielsen G, Mann J. Reducing weight  
13 gain in children through enhancing physical activity and nutrition: the APPLE project. *Int J*  
14 *Pediatr Obes*. 2006; **1**(3):146-52.

15  
16  
17 [30] **Neumark-Sztainer D**, Haines J, Robinson-O'Brian R, Hannan J, Robins M et al. 'Ready. Set.  
18 ACTION!' A theater-based obesity prevention program for children: a feasibility study. *Health*  
19 *Education Research* 2008; **24**: 407-420.

20  
21  
22 [31] **Hughes AR**, Sherriff A, Lawlor DA, Ness AR, Reilly JJ. Timing of Excess Weight Gain in the  
23 Avon Longitudinal Study of Parents and Children (ALSPAC). *Pediatrics*. 2011; **127**(3):e730-6.  
24 Epub 2011 Feb 21.

Tal  Intervention components, processes of behaviour change and methods of delivery

| Component                                                                                                       | Process of Behaviour change                                                                         | Method of delivery                                                                                                                                                                                                                                                                                                    | Delivered by                                                                                                     |
|-----------------------------------------------------------------------------------------------------------------|-----------------------------------------------------------------------------------------------------|-----------------------------------------------------------------------------------------------------------------------------------------------------------------------------------------------------------------------------------------------------------------------------------------------------------------------|------------------------------------------------------------------------------------------------------------------|
| <p><i>Component 1</i></p> <p>Engaging schools, children &amp; families</p> <p>Spring term (Yr 5)</p>            | Establish motivation and create a receptive environment                                             | <p>Whole school assembly</p> <p>Activity workshops (parents observe)</p> <p>Parents' evening (involving performances by the children)</p> <p>Newsletter articles</p>                                                                                                                                                  | <p>Researcher</p> <p>Professional sportsmen/dancers</p> <p>Teachers/Researcher/Drama group</p> <p>Researcher</p> |
| <p><i>Component 2</i></p> <p>Intensive Healthy Lifestyles Week – one week</p> <p>Summer term (Yr 5)</p>         | Establish motivation by developing children's confidence and skills and helping them make decisions | <p>PSHE lessons (morning)</p> <p>§Drama (afternoon) ( forum theatre; role play; food tasting, discussions, games etc)</p>                                                                                                                                                                                             | <p>Class teacher</p> <p>Drama group</p>                                                                          |
| <p><i>Component 3</i></p> <p>Goal Setting - goals set during week following drama</p> <p>Summer term (Yr 5)</p> | Take action by helping children create an action plan and implement goals.                          | <p>Questionnaire to enable children to reflect on snacking, consumption of fizzy drinks and physical activity.</p> <p>Goal setting sheet to go home to parents to complete with child.</p> <p>1:1 goal setting interview (goals sent home to parents)</p> <p>Parent's evening (child involvement – Forum Theatre)</p> | <p>Researcher/class teacher</p> <p>Researcher/parents</p> <p>Researcher</p> <p>Researcher/Drama group</p>        |
| <p><i>Component 4</i></p> <p>Reinforcement activities</p> <p>Autumn term (Yr 6)</p>                             | Stay motivated by helping children to monitor, assess and adapt goals                               | <p>Whole school assembly followed by drama workshops to remind school/children of messages and to prepare class assembly</p> <p>PSHE lesson to remind children of messages and goals.</p>                                                                                                                             | <p>Drama group</p>                                                                                               |

1  
2  
3  
4  
5  
6  
7  
8  
9  
10  
11  
12  
13  
14  
15  
16  
17  
18  
19  
20  
21  
22  
23  
24  
25  
26  
27  
28  
29  
30  
31  
32  
33  
34  
35  
36  
37  
38  
39  
40  
41  
42  
43  
44  
45  
46  
47  
48  
49  
50  
51  
52  
53  
54  
55  
56  
57  
58  
59  
60

|  |  |                                                                                                                                                                                                                                                                                                                              |                                                                                                                                                       |
|--|--|------------------------------------------------------------------------------------------------------------------------------------------------------------------------------------------------------------------------------------------------------------------------------------------------------------------------------|-------------------------------------------------------------------------------------------------------------------------------------------------------|
|  |  | <p>Children monitor goals on personalised chart</p> <p>Class to deliver assembly about the project to rest of school (parents invited to attend)</p> <p>1:1 goal supporting interview to discuss facilitators/barriers and to plan new coping strategies (renewed goals sent home to parents)</p> <p>Newsletter articles</p> | <p>Class teacher</p> <p>Class teacher provided prompts</p> <p>Children to all other year groups in the school</p> <p>Researcher</p> <p>Researcher</p> |
|--|--|------------------------------------------------------------------------------------------------------------------------------------------------------------------------------------------------------------------------------------------------------------------------------------------------------------------------------|-------------------------------------------------------------------------------------------------------------------------------------------------------|

§The drama framework includes 4 characters, each represented by one of the actors, whose attributes related to the three healthy lifestyle messages (overall behavioural objectives). Children choose which of the characters they most resemble then work with that actor to help the character learn to change their behaviour

**Comment [j23]:** Table added to provide clarity on the components of the intervention, methods of delivery and who delivers them. Response to reviewers 1 and 3.

**Table** Baseline characteristics of children

|                                                                         | Intervention<br>(n=80)        | Control<br>(n=122)            | Total<br>(n=202)              |
|-------------------------------------------------------------------------|-------------------------------|-------------------------------|-------------------------------|
| <b>Demographics</b>                                                     |                               |                               |                               |
| Age, years, mean (SD)                                                   | 9.69 (0.3)                    | 9.69 (0.3)                    | 9.69 (0.3)                    |
| <b>Sex</b>                                                              |                               |                               |                               |
| % (n) Male                                                              | 50 (40)                       | 50 (61)                       | 50 (101)                      |
| % (n) Female                                                            | 50 (40)                       | 50 (61)                       | 50 (101)                      |
| <b>Anthropometric Measures</b>                                          |                               |                               |                               |
| % (n) Overweight or Obese( $\geq 85^{\text{th}}$ centile) <sup>20</sup> | 23.7 (18)                     | 26.1 (31)                     | 25.1 (49)                     |
| Mean (sd) BMI<br>[range]                                                | 17.44 (2.6)<br>[13.3 to 25.4] | 17.89 (2.8)<br>[13.7 to 25.1] | 17.65 (2.7)<br>[13.3 to 25.4] |
| Mean (sd) BMI sds<br>[range]                                            | 0.3 (1.1)<br>[-2.3 to 2.5]    | 0.4 (1.1)<br>[-2.0 to 2.9]    | 0.3 (1.1)<br>[-2.3 to 2.9]    |

**Comment [j24]:** Table altered in response to reviewer 1, comment 1.3.

1  
2  
3 March 9<sup>th</sup> 2011  
4

5 Dear Zara,  
6

7 As yet, no appropriate checklist has been created for the reporting of studies showing the  
8 development, feasibility and acceptability of interventions. Even the STROBE checklist has many  
9 sections that are not applicable, so as you suggest, I have not uploaded a checklist from the ones  
10 provided.  
11  
12

13  
14  
15  
16 Best Wishes

17  
18 Jennifer Lloyd  
19  
20  
21  
22  
23  
24  
25  
26  
27  
28  
29  
30  
31  
32  
33  
34  
35  
36  
37  
38  
39  
40  
41  
42  
43  
44  
45  
46  
47  
48  
49  
50  
51  
52  
53  
54  
55  
56  
57  
58  
59  
60

For peer review only

1  
2  
3  
4  
5  
6  
7  
8  
9  
10  
11  
12  
13  
14  
15  
16  
17  
18  
19  
20  
21  
22  
23  
24  
25  
26  
27  
28  
29  
30  
31  
32  
33  
34  
35  
36  
37  
38  
39  
40  
41  
42  
43  
44  
45  
46  
47  
48  
49  
50  
51  
52  
53  
54  
55  
56  
57  
58  
59  
60

Figure 1: Phase 1 – Development study (2005-2006).

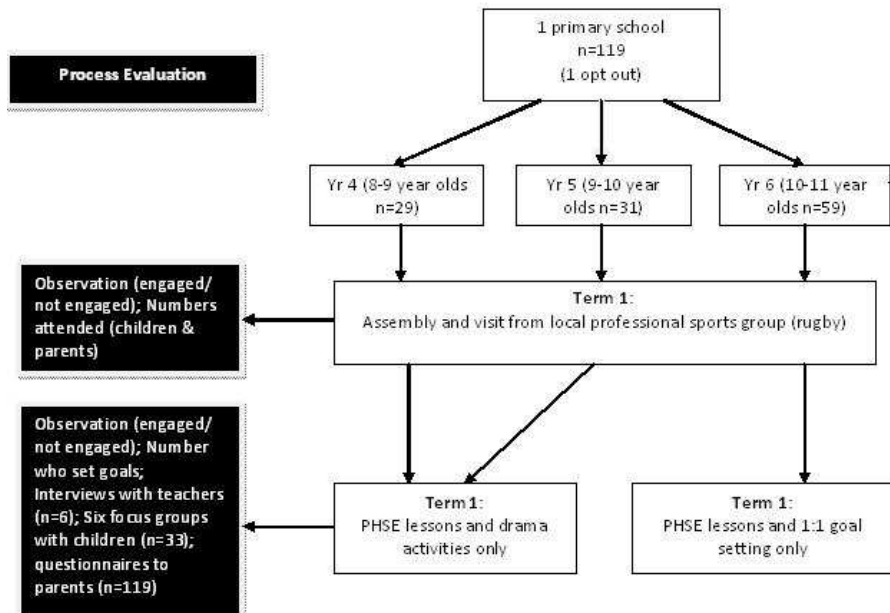

Phase 1 - Development study (2005-2006)  
184x138mm (96 x 96 DPI)

Review only

Figure 2: Phase 2 – 'Proof of concept' study (2006-2007)

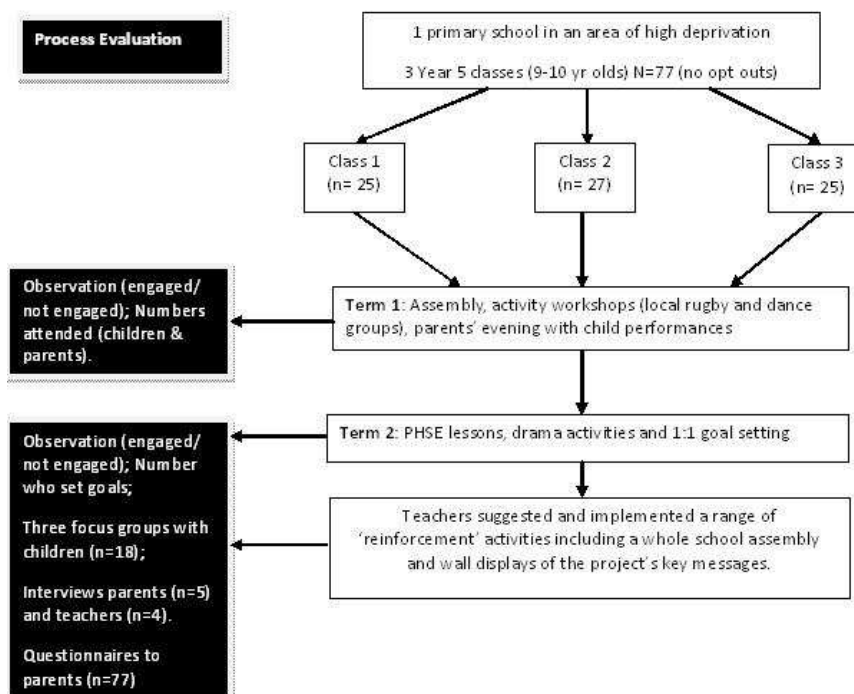

Phase 2 - 'Proof of concept' study (2006-2007)  
184x138mm (96 x 96 DPI)

Review only



Figure 3: Phase 3 – Exploratory trial 2008-2010

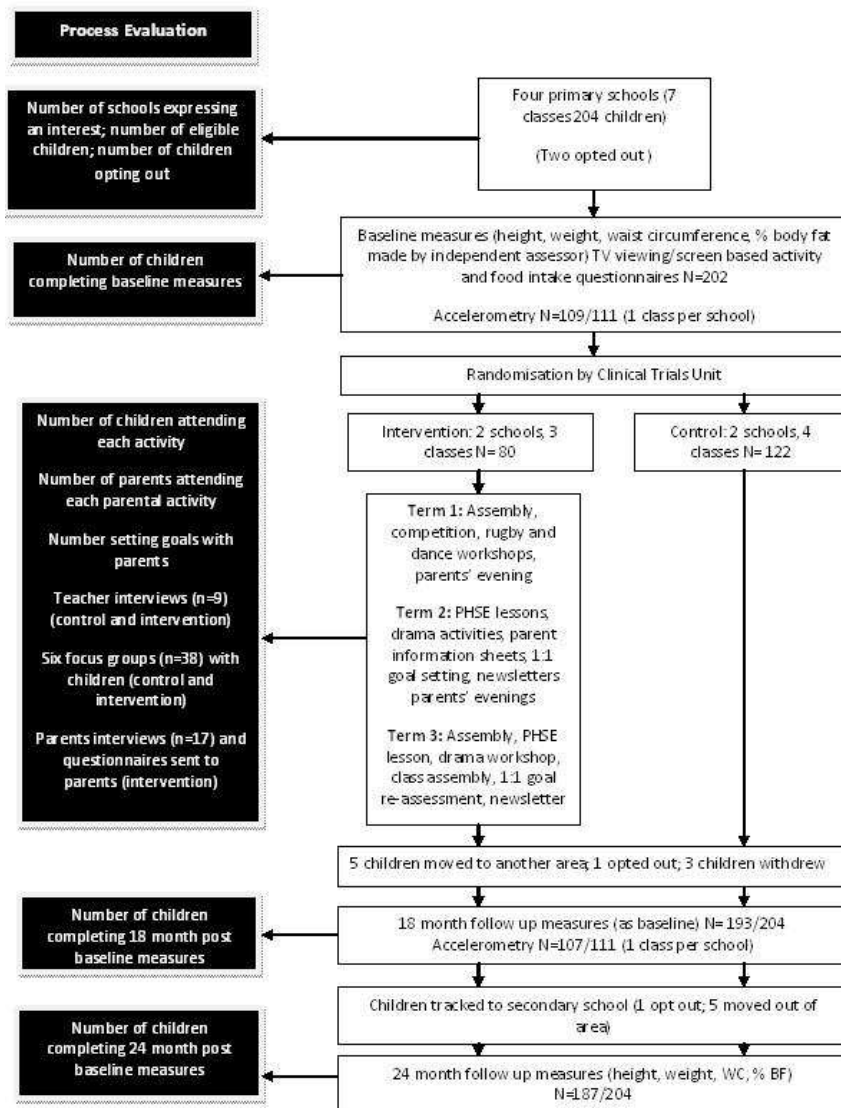

Phase 3 - Exploratory randomised controlled trial (2008-2010)  
184x214mm (96 x 96 DPI)



**The development, feasibility and acceptability of a school-based obesity prevention programme: Results from three phases of piloting.**

|                               |                                                                                                                                                                                                                                                                                 |
|-------------------------------|---------------------------------------------------------------------------------------------------------------------------------------------------------------------------------------------------------------------------------------------------------------------------------|
| Journal:                      | <i>BMJ Open</i>                                                                                                                                                                                                                                                                 |
| Manuscript ID:                | BMJ Open-2010-000026.R2                                                                                                                                                                                                                                                         |
| Article Type:                 | Research                                                                                                                                                                                                                                                                        |
| Date Submitted by the Author: | 11-Apr-2011                                                                                                                                                                                                                                                                     |
| Complete List of Authors:     | Wyatt, Katrina; Peninsula College of Medicine and Dentistry<br>Lloyd, Jennifer; Peninsula College of Medicine and Dentistry,<br>Institute for Health Service Research<br>Creanor, Siobhan; University of Plymouth<br>Logan, Stuart; Peninsula College of Medicine and Dentistry |
| <b>Subject Heading</b>:       | Public health                                                                                                                                                                                                                                                                   |
| Keywords:                     | Child, Obesity, Intervention, Feasibility Study, Health Behaviours, Exploratory trial                                                                                                                                                                                           |
|                               |                                                                                                                                                                                                                                                                                 |

SCHOLARONE™  
Manuscripts

1  
2 The development, feasibility and acceptability of a school-based obesity prevention  
3 programme: Results from three phases of piloting.  
4  
5  
6

7 Katrina M Wyatt<sup>1</sup> \*Jennifer J Lloyd<sup>1</sup> Siobhan Creanor<sup>2</sup> Stuart Logan<sup>3</sup>  
8

9 <sup>1,3</sup>Institute for Health Service Research, Peninsula College of Medicine and Dentistry, University  
10 of Exeter, Exeter, UK  
11

12 <sup>2</sup>Centre for Health & Environmental Statistics, University of Plymouth, Plymouth, UK  
13

14  
15 Email addresses:  
16

17 \*JLL: [jennifer.lloyd@pms.ac.uk](mailto:jennifer.lloyd@pms.ac.uk)  
18

19 KMW: [katrina.wyatt@pms.ac.uk](mailto:katrina.wyatt@pms.ac.uk)  
20

21 SC: [siobhan.creanor@plymouth.ac.uk](mailto:siobhan.creanor@plymouth.ac.uk)  
22

23 SL: [stuart.logan@pms.ac.uk](mailto:stuart.logan@pms.ac.uk)  
24  
25  
26  
27

28 \*Corresponding author: Tel: 01392 722972 Fax: 01392 421009  
29

30 The Corresponding Author has the right to grant on behalf of all authors and does grant on  
31 behalf of all authors, an exclusive licence (or non-exclusive for government employees) on a  
32 worldwide basis to the BMJ Publishing Group Ltd and its Licensees to permit this article (if  
33 accepted) to be published in Archives of Disease in Childhood and any other BMJ PGL products  
34 to exploit all subsidiary rights, as set out in our licence  
35  
36  
37  
38  
39

40  
41  
42 Key words: Child, obesity, intervention, feasibility study, health behaviours, exploratory trial  
43

44  
45 Word count: 3,736  
46  
47  
48  
49

**ABSTRACT**

**Objectives:** To develop a school-based obesity prevention programme and evaluate the feasibility and acceptability of the intervention and the planned definitive cluster randomized trial.

**Design:** Three stage pilot involving six schools (398 children) in Southwest England, including an exploratory randomised controlled trial and qualitative interviews and focus groups with teachers, parents and children.

**Intervention:** The Healthy Lifestyle Programme uses a range of school-based activities including lessons, assemblies, parents' evenings, interactive drama workshops and goal setting to engage schools, children and their families.

**Results:** Of the 398 eligible children in the three pilot phases, only four opted out and a further three children withdrew from the exploratory trial. In the exploratory trial, baseline measures (anthropometric and behavioural) were obtained for 202/204 eligible children in 4 schools and both 18 and 24 month outcome measures for 193/204 participants and 187/204 respectively. Qualitative data show that delivery of the intervention is feasible within schools and acceptable to teachers, children and families. In the exploratory trial 18/80 children (24%) in the intervention schools and 31/122 (26%) in the control schools were overweight or obese at baseline, increasing, at 18 months follow up, to 38/119 (32%) in the control schools compared with 18/74 (24%) in the intervention schools. At 24 months the proportion of overweight and obese children in the control schools remained at 32% (36/114) whereas the proportion in the intervention schools decreased slightly to 22% (16/73).

1  
2 **Conclusion:** The Healthy Lifestyle Programme is feasible to deliver and acceptable to schools,  
3  
4 children and their families. We recruited, retained and obtained outcome measures from 92%  
5  
6 of eligible children in the exploratory trial, including measures taken after transition to  
7  
8 secondary school, suggesting that a definitive trial is likely to be deliverable.  
9

#### 10 11 **Article focus**

- 14 • To show the development and evaluation of a novel school-based obesity prevention  
15 programme through 3 detailed stages of piloting  
16  
17
- 18 • To present evidence for the feasibility and acceptability of the HeLP Programme for  
19 schools, children and their families  
20  
21
- 22 • To present the evidence of the feasibility of the trial design and outcome measures  
23 through an exploratory trial involving 4 schools and 202 children.  
24  
25  
26  
27

#### 28 29 **Key messages**

- 30 • The HeLP Programme has been systematically developed and uses drama based  
31 activities to engage the school, children and their families in healthy lifestyle messages  
32 and activities  
33  
34
- 35 • The Programme has been piloted in six schools involving 398 children and results  
36 suggest that it is acceptable and feasible to schools, children and their families  
37  
38
- 39 • Results from the pilot phases have provided sufficient evidence to support the  
40 evaluation of the HeLP intervention in a full scale trial  
41  
42  
43  
44  
45  
46  
47  
48

## Strengths and Limitations

Strengths: The HeLP intervention has undergone a systematic development process using research evidence, behavioral theory, stakeholder consultation and piloting. This has enabled the researchers to gain a deeper understanding of the context in which the intervention was to be delivered in order to maximize engagement at all levels. Preliminary results suggest the Programme may affect behaviours associated with overweight and obesity.

Limitations: Interviews and focus groups were carried out by the lead researcher who had built up a relationship with the schools, children and their families. This may have affected responses as the participants might not have wanted to express negative opinions. However, the ongoing support and retention of the schools and children would suggest that if there was such an effect, it was a very slight one. Piloting has taken place in schools in varying socioeconomic areas; and although, there is a limited ethnic mix of children in the South West of England, the drama framework has been specifically developed to allow flexibility and adaptation to ensure it is recognizing and responding to the needs of the children receiving it.

## Background

There has been a substantial increase in the proportion of children in the UK who are overweight. The Health Survey for England (2007) reported that 19% of girls and 18% of boys aged 11-15 were obese and 34% of girls and boys were overweight or obese [1]. The National Child Measurement Programme (2008/2009) reported that by age 10-11 years, school year 6, nearly one in three children in England were either overweight or obese [2]. Being overweight in childhood is associated with adverse consequences including metabolic abnormalities, increased risk of Type II diabetes, and musculo-skeletal and psychological problems [3]. Over 50% of obese children become obese adults [4] with significant health consequences [5].

Obesity results from an imbalance between consumption and expenditure of energy. Epidemiological studies suggest a number of risk factors, the strongest of which is having one or more overweight parents [6] and there are also strong associations, between the risk of overweight and socio-economic status, diet, physical activity levels and other lifestyle factors [7]. At a population level, the consumption of processed and fast food, including sweetened fizzy drinks, has increased while that of fruit and vegetables has declined and portion size in pre-packaged food has increased substantially [8].

The association with overweight and obesity and physical activity remains contested, with cross sectional studies showing a reduction in levels and intensity of physical activity in children and an increase in % body fat [9]. Longitudinal studies are scarce, although recent data suggests that fatness leads to a reduction in physical activity rather than the other way round [10]. Some studies have reported an association between time spent watching television and obesity [11].

1  
2 Not only is television viewing a sedentary activity but it is also positively correlated with total  
3  
4 calorific intake [12] and the consumption of snack foods [13].  
5  
6

7 More recently community wide approaches to preventing and reducing obesity in children are  
8  
9 being developed and evaluated [14, 15]. These initiatives take a multistrategy, multisite  
10  
11 approach with school-based interventions forming part of the overall programme of events  
12  
13

14 The most recent systematic review (2008) of controlled trials of school-based interventions  
15  
16 concluded that interventions which increase activity and reduce sedentary behaviour may help  
17  
18 children to maintain a healthy weight, although results were short-term and inconsistent [16].  
19  
20 The review also reported that trials of dietary interventions also produced inconsistent results,  
21  
22 although the reviewers suggest that a combined approach may be more effective in preventing  
23  
24 children becoming overweight in the long term.  
25  
26

27 The Healthy Lifestyle Programme (HeLP) is a school-based intervention which seeks to deliver  
28  
29 healthy lifestyle messages and provide simple individually-tailored strategies to assist change  
30  
31 relating to healthy activity and eating. HeLP takes a population approach seeking to change  
32  
33 behaviour at a family as well as at an individual and institutional level. The development of  
34  
35 HeLP followed the MRC guidance for the development and evaluation of complex interventions  
36  
37 [17]. This paper reports on the iterative development and refinement of HeLP, in accordance  
38  
39 with the 'development' and the 'feasibility and piloting' processes of the MRC framework, and  
40  
41 presents results from, an initial development phase, a 'proof of concept' phase and an  
42  
43 exploratory trial.  
44  
45  
46  
47  
48  
49  
50  
51  
52  
53  
54  
55  
56  
57  
58  
59  
60



## Development, feasibility and piloting methods

The intervention was developed using an Intervention Mapping protocol [18] utilising research evidence, behavioural theory, extensive stakeholder consultation and piloting to develop key behavioural objectives for each target group (teachers, children and parents) and specific intervention techniques and strategies that linked directly to them. HeLP aims to deliver a general healthy lifestyle message relating to the energy balance and within this context, three evidence-based key messages are emphasised: a decrease in the consumption of sweetened fizzy drinks; an increase in the proportion of healthy snacks consumed and a reduction in TV viewing and other screen-based activities. These messages are consistent with the strategies suggested in the NICE guidance [19]. As a means of communicating these messages in a simple and easy to remember way we used a logo of '80/20', suggesting we should aim to eat healthily and be active 80% of the time. We hypothesised that this approach would enable children and their families to negotiate and have control over the choices they make; an important consideration in behaviour change [20]. Process evaluation methods during all three phases included semi structured interviews with staff and parents, focus groups with children, questionnaires responses from children and parents, documentation of child, parental and staff involvement and observation of intervention delivery.

*Phase 1 - Assess range of delivery methods for key objectives identified in the intervention mapping process (2005-2006; One school; n=119 children, aged 8-11)*

We worked with children, parents and teachers from a single primary school to try candidate behaviour change approaches for different age groups. We delivered healthy lifestyle messages

1  
2 to three age groups, 8-9 year olds; 9-10 year olds and 10-11 year olds, using lessons and either  
3  
4 interactive drama activities or goal setting (figure 1). Six focus groups (two for each year group,  
5  
6 n=33) were held with the children to ascertain views on activities and what messages and  
7  
8 concepts they remembered. Children whose parents consented to the focus groups were  
9  
10 randomly selected to participate. Semi-structured interviews were held with teachers (n=6) and  
11  
12 parents were invited to complete a questionnaire about the study.  
13

14  
15  
16 *Phase 2 – Proof of Concept - Pilot of intervention and outcome measures (2006-2008; One*  
17  
18 *school; n=77 children, aged 9-10)*  
19

20  
21 Based on the results from the first phase, the intervention was further developed (figure 2) and  
22  
23 evaluated in a second primary school, in an area of high social deprivation, with three Year 5  
24  
25 classes. Baseline and 6 week post-intervention height, weight, waist circumference, % body fat,  
26  
27 objective physical activity, food intake and TV viewing/screen based activity were assessed.  
28  
29 Food intake was assessed using the adapted version of the Food Intake Questionnaire (FIQ)  
30  
31 [21], an adapted recall method which asks whether specific foods were consumed the previous  
32  
33 day. Children completed the FIQ twice in order to obtain a weekday and weekend food  
34  
35 intake. TV viewing/screen based usage was assessed using the adapted version of the Children's  
36  
37 TV Viewing Habits Questionnaire [22]. To assess physical activity, children were asked to wear a  
38  
39 GT1M Actigraph (Actigraph LLC, Pensacola, FL<http://www.theactigraph.com>) during waking  
40  
41 hours over seven consecutive days (5 weekdays and one weekend). Two focus groups (a total of  
42  
43 14 children) were held with children who 'engaged fully' (defined by enthusiasm for the study,  
44  
45 desire to set and maintain goals) and a further focus group with those who appeared  
46  
47  
48  
49  
50  
51  
52  
53  
54  
55  
56  
57  
58  
59  
60

Deleted:

1  
2 'indifferent' (reluctant to take part in activities, needed several prompts regarding goals or did  
3  
4 not want to set goals) to the study and the messages (n=4). Interviews were held with the staff  
5  
6 (n=3) and head teacher (n=1) and parents of the children (n=5). Parents were also invited to  
7  
8 complete a questionnaire about the study.  
9

10  
11 *Phase 3 - Exploratory randomised controlled trial (2008-2010; 4 schools (7 classes); n=204*  
12  
13 *children, aged 9-10)*

14  
15  
16 Phase 3 sought to assess, for schools, children and their families: recruitment and retention in  
17  
18 control and intervention schools; feasibility and acceptability of the HeLP intervention and of  
19  
20 future trial outcome measures and facilitators and barriers to the uptake of the intervention. All  
21  
22 state Primary schools in Exeter were eligible to take part if they had at least one single age year  
23  
24 5 group (i.e. not year 4/5 or 5/6 mixed classes). Schools were recruited via the Devon  
25  
26 Association of Primary Head teachers. Baseline height, weight, waist circumference, % body fat,  
27  
28 food intake, TV viewing/screen-based activity and physical activity (as in phase 2) were  
29  
30 collected prior to randomization (two control and two intervention schools). These same  
31  
32 measures were then collected 18 months post baseline and anthropometric measures only  
33  
34 were collected at 24 months post baseline which involved tracking the children to their  
35  
36 secondary school (figure 3). All anthropometric measures at each time point were taken by an  
37  
38 independent assessor blind to allocation. Six focus groups across the 4 schools (a total of 38  
39  
40 children) were carried out from a selection of children whose parents gave consent (groups  
41  
42 were purposefully sampled to reflect gender mix and weight status) and semi structured  
43  
44  
45  
46  
47  
48  
49  
50  
51  
52  
53  
54  
55  
56  
57  
58  
59  
60

1  
2 interviews were conducted with staff (n=9) and parents (n=17) in control and intervention  
3  
4 schools.  
5  
6  
7  
8  
9  
10  
11  
12  
13  
14  
15  
16  
17  
18  
19  
20  
21  
22  
23  
24  
25  
26  
27  
28  
29  
30  
31  
32  
33  
34  
35  
36  
37  
38  
39  
40  
41  
42  
43  
44  
45  
46  
47  
48  
49  
50  
51  
52  
53  
54  
55  
56  
57  
58  
59  
60

For peer review only

## RESULTS

**Phase 1:** Of the 120 children invited to participate, only one child opted out (Figure 1).

*User views:* Many parents reported in the questionnaire positive parent/family behaviour changes and qualitative data from teachers, children and their parents suggested that Year 5s (9-10 year olds) were more receptive to the messages and more able and willing than the year 4s and 6s to translate them into possible behaviour changes. In addition, it appeared that this year group engaged their families to the greatest extent. Teachers thought that the education lessons should be taught consecutively over one week to maintain momentum and that the drama and goal setting had the potential to work synergistically by engaging the children through the drama and following this up with encouraging the children, with their parents support, to make changes through setting simple goals. Parents and children also highlighted the need for a greater variety of activities to introduce the key messages and concepts in order to engage both boys and girls.

*Implications:* In order to build a trusting relationship, a range of activities were developed to introduce the school, children and their families to the project's key messages. A 'Healthy Lifestyles Week' was developed consisting of education lessons in the morning (delivered by teachers) which dovetailed with interactive drama activities in the afternoon (delivered by a local drama group). In order to guide the sequential development of the intervention components across the school year, key performance objectives, developed using an intervention mapping process [23], were mapped onto the Health Action Process Model (HAPA) of behaviour change that suggests behaviour change occurs through a sequence of adoption

1  
2 (establish motivation), initiation (take action) and maintenance (stay motivated) processes [24].

3  
4 The intervention components at this stage of development were: creating a receptive  
5  
6 environment, a healthy lifestyles week and goal setting with year 5 children (9-10 year olds) as  
7  
8 the target group.  
9

10  
11 **Phase 2:** No child opted out (figure 2) and no adverse events (e.g. child feeling stigmatised)  
12  
13 were reported by parents, teachers or children in questionnaires, focus groups or individual  
14  
15 discussions. Self-report questionnaires and accelerometry data from the children suggested  
16  
17 changes with respect to snacking and sedentary behavior.  
18

19  
20 *User views:* Staff were enthusiastic about the Programme, in part because it met the National  
21  
22 Curriculum guidelines for Personal Social Health Education (PHSE) and Citizenship, and  
23  
24 importantly because they felt it promoted families' engagement with the school. Some teachers  
25  
26 felt that the drama had a positive effect on the self esteem of the children, particularly those  
27  
28 with additional learning needs. Some teachers suggested further activities for the subsequent  
29  
30 term to reinforce the messages and refocus the children and their parents on their goals. Many  
31  
32 parents reported that their family had made lifestyle changes and that their child was willing to  
33  
34 try new foods. The children enjoyed the drama activities and felt that they could relate to the  
35  
36 characters within the drama framework who made them more motivated to set their own  
37  
38 goals. Some children reported that they had started going to more after school clubs.  
39  
40

41  
42 *Implications:* An additional component was added to the intervention - 'reinforcement  
43  
44 activities' to take place at the beginning of year 6, to motivate children to stick to their goals. In  
45  
46 addition, minor refinements were made to the education lessons and the drama scripts to  
47  
48

1  
2 enhance delivery and continuity. Table 1 shows the final intervention components, how they  
3  
4 relate to the HAPA model with their associated methods and agents of delivery.  
5  
6

7 **Phase 3:** Eight schools expressed an interest in participating in this exploratory trial and four  
8  
9 schools were randomly selected to take part.  
10

### 11 **Feasibility data**

12  
13  
14  
15 Of the 204 children eligible to participate, two opted out of the study (figure 3). Baseline  
16  
17 anthropometric measures, food intake and TV viewing/screen based activity were recorded for  
18  
19 202 children. We measured physical activity, using accelerometry, from one randomly selected  
20  
21 class in each of the 4 participating schools. Measures were successfully obtained from 109/111  
22  
23 with 95% (104/111) of children providing useable data (3 good weekdays and one weekend  
24  
25 day). Prior to the 18 month post baseline measures, five (2 control and 3 intervention) children  
26  
27 had left the area and one child opted out (control school). Three girls in the same intervention  
28  
29 school withdrew prior to the 18 month measures being collected; this coincided with the  
30  
31 children being given a simple snacking and activity diary to complete over a 2 week period and  
32  
33 feedback (teacher and parents) suggested this focused the girls too much on what they were  
34  
35 eating and their parents felt they were restricting certain food groups.  
36  
37  
38  
39

40  
41 Eighteen month post baseline measures were collected from 193/204 children, with 107/111  
42  
43 children providing accelerometry data of which 85% (95/111) was useable. At collection of the  
44  
45 twenty four month anthropometric data, one girl (control school) did not want to be measured  
46  
47  
48  
49

1  
2 and five children (3 control, 2 intervention) had moved out of the area, therefore data was  
3  
4 obtained from 187/204 children, 92% of the original cohort.  
5  
6

### 7 **Summary of anthropometric baseline data from the exploratory trial**

8  
9  
10 In the intervention schools, 24% (18/80) of children were classified as overweight or obese  
11  
12 compared to 26% (31/122) in the control schools. One child (intervention school) was classified  
13  
14 as being underweight [25]. Mean BMI was 17.6 (2.7) (95% CI 17.27 to 18.02). Almost 20%  
15  
16 (39/202) had a % body fat  $\geq$  the 85<sup>th</sup> centile [26] and 43% (86/202) had a waist circumference  $\geq$   
17  
18 the 85<sup>th</sup> centile [27]. Table 2 summarizes child demographics and BMI status for the two  
19  
20 groups.  
21  
22

### 23 **Process evaluation of the Exploratory Trial**

24  
25  
26 All children (n=80) in the intervention schools participated in the healthy lifestyle week and 90%  
27  
28 set goals with their families around lifestyle change. Seventy five percent of parents  
29  
30 participated in one or more programme activity.  
31  
32

33 *User Views:* Parents were adamant their children's diet and activity choices were their  
34  
35 responsibility but felt school was a good place to reinforce these messages. Parents reported a  
36  
37 greater acceptance of rules relating to screen-time and healthy eating in their child as well as  
38  
39 initiating discussion with other family members around healthy lifestyles.  
40  
41

42 Teachers agreed year 5 was the right target group as children are gaining independence whilst  
43  
44 still amenable to the messages. Some commented that the intervention had boosted the  
45  
46 children's self-esteem, had a positive effect on the class socially and created additional  
47  
48



1  
2 opportunities to link with parents. Teachers felt using young actors to deliver the messages was  
3  
4 the key to achieving engagement with this age group.  
5

6  
7 Children were unanimous in their enjoyment of the drama activities and equally unequivocal  
8  
9 that these activities should be carried out by people external to the school. They did not  
10  
11 comment on the weighing and measuring and when this was brought up in the focus groups,  
12  
13 dismissed it as 'fine'. The key message the children remembered was the importance of  
14  
15 replacing unhealthy snacks with more healthy alternatives and replacing screen-based activities  
16  
17 with more active pursuits which they enjoy.  
18  
19

20  
21 *Implications:* Following the withdrawal of 3 girls from an intervention class, the snacking and  
22  
23 activity diary activity has been withdrawn from component 4 (reinforcement activities). The  
24  
25 education lessons were refined to include more self monitoring activities for the children within  
26  
27 the school and home environment in order keep the children focused on their goals in year 6.  
28

29  
30 *Summary of 18 and 24 month post baseline anthropometric data from the Exploratory trial*  
31

32  
33 At 18 months, the proportion of overweight and obese children increased in the control schools  
34  
35 from 26% (31/122) to 32% (38/119) but remained at 24% (18/74) in the intervention schools. At  
36  
37 24 months the proportion of overweight/obese children remained at 32% (36/114) in the  
38  
39 control schools and decreased slightly to 22% (16/73) in the intervention schools. Other  
40  
41 anthropometric data and the results from the questionnaires and accelerometry will be  
42  
43 reported elsewhere.  
44  
45  
46  
47  
48  
49

## DISCUSSION

To date the evidence base for effective interventions to prevent and reduce childhood obesity is limited but suggests that a multi-component approach, addressing both sides of the energy balance and engaging families as well as the children, is more likely to be effective [16]. Using an intervention mapping protocol [18, 23] involving literature reviews, extensive stakeholder consultation, expert workshops and three stages of piloting, we have created a programme of activities to engage and change behaviours at a school, child and family level. Such an intervention could also form part of a wider community approach to tackling obesity such as the programmes described in 'Romp and Chomp' and 'Being Active, Eating Well' [15, 14]. Unlike previous school-based interventions [18, 29], HeLP activities have been ordered to promote and support behaviour change in children and their families using the HAPA model [24]. Component 1 seeks to establish motivation and create a receptive context for the 'Healthy Lifestyles Week' (component 2). This component seeks to further motivate the children by building their confidence and skills and helping them make decisions. We worked closely with a local theatre company to design a drama framework built around 4 characters, each played by one of the actors whose attributes relate to our healthy lifestyle messages. Children have to choose which character they most resemble and then work with that character to help them change their behaviour. The actors became role models as they worked with the children in a range of interactive activities such as food tasting, making adverts, looking at ingredients and role play. The rationale for using the drama and the young actors as role models was to enthuse the children so much that they took the messages home to their parents and families and, crucially, encouraged them to come into the school and engage with the Programme. Previous research

1  
2 has suggested that low income parents may be more likely to attend an event in which their  
3 children are participants than an educational event, (e.g. eating and joint parent-child classes)  
4 [30]. Qualitative data revealed that the dynamic nature of the drama and the use of the young  
5 actors did indeed engage the children to such an extent that they talked exuberantly about the  
6 Programme with their parents and siblings and encouraged them to attend events, particularly  
7 if they were going to be performing with the actors. Interestingly, it was the year 5s (9-10 year  
8 olds) who were best able to engage their families and translate the messages into possible  
9 behavior change which is why we decided to focus on this age group in subsequent pilots. The  
10 role play activities allowed us to teach the children how to communicate the healthy lifestyle  
11 messages to their family and seek their support in a subtle and positive manner. Component 3  
12 moves the children on to helping them create an action plan and implement their goals with  
13 the support of their parents and component 4 helps them to remain motivated by delivering a  
14 range of reinforcement activities to monitor, assess and adapt their goals. Full details of each  
15 intervention component and their associated behaviour change techniques and methods of  
16 delivery are reported elsewhere [23].

17  
18 One of the aims of the intervention was to explicitly affect the whole school environment by  
19 engaging all staff using staff meetings, whole school assemblies, competitions and parents  
20 evenings. During the Healthy Lifestyles Week, the year 5 teachers delivered the pre prepared  
21 education lessons in the morning and then observed the theatre company deliver the  
22 interactive drama activities in the afternoon. Feedback from interviews and informal  
23 discussions with the teachers suggested that the observation of the drama led to an increase in  
24 their understanding and motivation which, in turn, led to greater support for, and involvement

1  
2 in, the Programme. After pilot 2, teachers and the head developed further activities relating to  
3  
4 the healthy lifestyle messages after we had trialled the original ideas, which lead to the addition  
5  
6 of component 4. The HeLP intervention has been specifically designed so that it can be adapted  
7  
8 for use in different types of schools, increasing its generalisability, whilst still remaining  
9  
10 standardized enough to maintain fidelity. The activities within the Programme dovetail with the  
11  
12 National Curriculum objectives for this age group. The drama framework is based around 4  
13  
14 characters with whom the children identify and these can be adapted for schools in a variety of  
15  
16 different settings. In addition, the children drive the drama scenes as this is key to engagement  
17  
18 and encouraging ownership of the healthy lifestyle messages. HeLP has been piloted in a range  
19  
20 of schools with children from different socio-economic groups and we have found no difference  
21  
22 in the levels of engagement and parental involvement. One limitation, however, is that there is  
23  
24 little ethnic mix in schools in Exeter, but we would argue that the drama framework can be  
25  
26 adapted to accommodate this.  
27  
28

29  
30 As well as seeking to develop a novel and adaptable intervention that engages schools, children  
31  
32 and their families we sought to determine whether our proposed trial design and outcome  
33  
34 measures are feasible and acceptable for schools as well as individual children and their  
35  
36 families. The baseline anthropometric data from Phase 3 is very similar to national figures  
37  
38 reported in the Health Survey for England (2007) and the National Child Measurement  
39  
40 Programme (NCMP) (2008/9). At 24 months, however, the percentage of overweight and obese  
41  
42 children in the control schools increased by 6%, mirroring the local NCMP data for 10-11 year  
43  
44 olds in Exeter, whilst decreasing by 2% in the intervention schools. Although the exploratory  
45  
46 trial was not powered to detect statistically significant differences between intervention and  
47  
48

1  
2 control schools, the finding that the proportions overweight and obese remained at baseline  
3  
4 levels in the intervention schools is encouraging, particularly in light of recent tracking data  
5  
6 showing that the greatest increases in weight in a non obese sample are between the ages of 7  
7  
8 and 11 years [31].  
9

10  
11 Using the MRC framework for development and evaluation of complex interventions [17] we  
12  
13 have developed and refined a novel school-based programme to prevent and reduce obesity in  
14  
15 children. We have demonstrated the feasibility and acceptability of the intervention and shown  
16  
17 that it engages children, schools and families. We have also demonstrated that we can recruit  
18  
19 schools and children and collect baseline measures prior to randomisation. Retention of  
20  
21 children has been excellent with very few losses to follow up at secondary school. Results from  
22  
23 these pilot stages have provided us with the necessary and sufficient information to suggest  
24  
25 that the HeLP intervention should now be evaluated in a full-scale trial.  
26  
27

28  
29 **Acknowledgements:** The authors are very grateful to the participating schools, children and  
30  
31 their families who gave up their time for the study. We would also like to acknowledge Sandy  
32  
33 Akerman (Headbangers Theatre Company) who supported the design of the drama component  
34  
35 of the intervention.  
36

37  
38 **Funding:** Phase 1, 2 and 3 of development was funded by the Children's Research Fund  
39  
40 (registered charity no. 226128) and the NIHR Research for Patient Benefit (RfPB) Programme.  
41  
42 SL, KW and JL were partially supported by PenCLAHRC, the National Institute for Health  
43  
44 Research (NIHR) CLAHRC for the Southwest Peninsula. This paper presents independent  
45  
46 research commissioned by the National Institute for Health Research (NIHR). The views  
47  
48

1  
2 expressed are those of the author(s) and not necessarily those of the NHS, the NIHR or the  
3  
4 Department of Health.  
5  
6

7 **Competing interests:** None  
8  
9

10 **Ethics approval:** Ethical approval for each phase of the development and evaluation of the HeLP  
11  
12 intervention was granted from the Peninsula College of Medicine and Dentistry Ethics  
13  
14 Committee. This followed an approach to the NHS ethics committee who felt the study did not  
15  
16 fall within their remit.  
17  
18

19 **Author contribution:** JL, KW and SC drafted the manuscript with SL providing critical revision. JL  
20  
21 developed and supported the design and production of the intervention materials, coordinated  
22  
23 the implementation of the intervention during pilot phases and conducted interviews with  
24  
25 teachers and parents. JL and KW conducted the focus groups and SC performed the analyses on  
26  
27 the anthropometric data. JL, KW and SL designed the study and obtained funding. KW will act as  
28  
29 guarantor of the paper.  
30  
31

**Comment [j1]:** Clarification of SC's contribution.

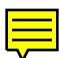

**What is already known on this topic**

There is little good quality evidence that existing interventions are effective in preventing and reducing childhood obesity.

Interventions which aim to affect both diet and activity seem to show more promise than those targeting either alone.

**What this study adds**

The Healthy Lifestyle Programme uses behavioural theory and novel interactive delivery methods to create the conditions to enable and support sustainable changes in behaviour for children and their families.

The Healthy Lifestyle Programme is feasible to deliver within the context of the National Curriculum at Key Stage 2 and acceptable to children, their families and schools.

The intervention package engages staff, children and families and preliminary results suggest the possibility that it may affect behaviours associated with overweight and obesity.

The high levels of recruitment, retention and collection of outcome measures in the exploratory trial suggest that a definitive trial is deliverable.

## References

- [1] **Health Survey for England 2007**. Children's BMI, overweight and obesity. NHS The Information Centre. [www.ic.nhs.uk/webfiles/publications/HSE07/](http://www.ic.nhs.uk/webfiles/publications/HSE07/)
- [2] **National Child Measurement Programme**: results from the school year 2008/09 NHS Centre for Information in Health and Social Care 2009.
- [3] **Gunnell DJ**, Frankel SJ, Nanchahal K, Peters TJ, Davey Smith G. Childhood obesity and adult cardiovascular mortality: a 57-y follow-up study based on the Boyd Orr cohort. *Am J Clinical Nutrition* 1998; **67(6)**:1111.
- [4] **Serdula MK**, Ivery D, Coates RJ, Freedman DS, Williamson DF, Byers T. Do obese children become obese adults? A review of the literature. *Prev Med* 1993; **22(2)**:167-177.
- [5] **Choi BC, Hunter DJ**, Tsou W, Sainsbury P. Diseases of comfort: primary cause of death in the 22nd century. *J Epidemiol Community Health*. 2005; **59**:1030-4.
- [6] **Lake JK**, Power C, Cole TJ. Child to adult body mass index in the 1958 British birth cohort: associations with parental obesity. *Arch Dis Child* 1997; **77**:376-81
- [7] **Li L**, Law C, Lo Conte R, Power C. Intergenerational influences on childhood body mass index: the effect of parental body mass index trajectories. *Am J Clin Nutr* 2009; **89**: 551-7.
- [8] **Nielsen SJ**, Popkin BM. Patterns and trends in food portion sizes, 1977-1998, *JAMA* 2003;**289**:450-453.
- [9] **Jiménez-Pavón D**, Kelly J, Reilly JJ. Associations between objectively measured habitual physical activity and adiposity in children and adolescents: Systematic review. *Int J Pediatr Obes*. 2010; **5(1)**:3-18.
- [10] **Metcalf BS**, Hosking J, Jeffery AN, Voss LD, Henley W, Wilkin TJ. Fatness leads to inactivity, but inactivity does not lead to fatness: a longitudinal study in children (EarlyBird 45). *Arch Dis Child*. Published online first: 23 June 2010. doi: 10.1136/adc/2009.175927.
- [11] **Marshall SJ**, Biddle SJ, Gorely T, Cameron N, Murdey I: Relationships between media use, body fatness and physical activity in children and youth: a meta analysis. *Int J Obes Relat Met Disord* 2004; **28(10)**:1238-46.
- [12] **Wiecha JL**, Peterson KE, Ludwig DS, Kim J, Sobol A, Gortmaker SL: When children eat what they watch. Impact of television viewing on dietary intake in youth. *Archives of Pediatrics & Adolescent Medicine* 2006; **160**: 436-42.
- [13] **Halford JCG**, Gillespie J, Brown V, Pontin EE, Dovey TM: Effect of television advertisements for foods on food consumption in children. *Appetite* 2004; **42**: 221-5.



- 1  
2  
3 [14] **de Silva-Sanigorski AM**, Bolton K, Haby M, Kremer P, Gibbs L, Waters E, Swinburn B.  
4 Scaling up community-based obesity prevention in Australia: background and evaluation design  
5 of the Health Promoting Communities: Being Active Eating Well initiative. *BMC Public Health*.  
6 2010;**10**:65
- 7  
8 [15] **de Silva-Sanigorski AM**, Bell AC, Kremer P, Nichols M, Crellin M, Smith M, Sharp S, de  
9 Groot F, Carpenter L, Boak R, Robertson N, Swinburn BA. Reducing obesity in early childhood:  
10 results from Romp & Chomp, an Australian community-wide intervention program. *Am J Clin*  
11 *Nutr.* 2010; **91**(4):831-40.
- 12  
13 [16] **Brown T**, Summerbell C A systematic review of school-based interventions that focus on  
14 dietary intake and physical activity levels to prevent childhood obesity: an update to the obesity  
15 guidance produced by the NICE. *Obesity Reviews* 2008; **10**:110-141.
- 16  
17 [17] **Medical Research Council**. A new Framework for the development and evaluation of RCTs  
18 for complex interventions to improve health. London: MRC, 2008.  
19 [www.mrc.ac.uk/complexinterventionsguidance](http://www.mrc.ac.uk/complexinterventionsguidance).
- 20  
21 [18] **Bartholomew K**, Parcel GS, Kok G, Gottlieb NH: Planning Health Promotion Programmes:  
22 An intervention mapping approach San Francisco: Jossey-Bass, 2006.
- 23  
24 [19] **NICE**. Obesity: the prevention, identification assessment and management of overweight  
25 and obesity in adults and children. London: NICE, 2006.
- 26  
27 [20] **Ryan RM.**, Patrick H, Deci EL., & Williams GC. Facilitating health behaviour change and its  
28 maintenance: Interventions based on self-determination theory. *The European Health*  
29 *Psychologist* 2008; **10**:2-5.
- 30  
31 [21] **Johnson B**, Hackett, AF. Eating habits of 11-14 year old school children living in less affluent  
32 areas of Liverpool, UK. *Journal of Human Nutrition and Dietetics* 1997; **10**:135-144.
- 33  
34 [22] **Owens J**, Maxim R, McGuinn M, Nobile C, Msall M, Alario A. Television-viewing habits and  
35 sleep disturbance in school children. *Pediatrics* 1999; **104**:e27.
- 36  
37 [23] **Lloyd J**, Logan S, Greaves C, Wyatt K. Evidence, Theory and Context – Using intervention  
38 mapping to develop a school-based intervention to prevent and reduce obesity in children  
39 *International Journal of Behavioural Nutrition and Physical Activity* 2010 (under review).
- 40  
41 [24] **Schwarzer, R**: Self-efficacy in the adoption and maintenance of health behaviors:  
42 Theoretical approaches and a new model. In *Self-efficacy: thought control of action* Edited by  
43 Schwarzer R. London: Hemisphere; 1992:217-243.
- 44  
45 [25] **Cole TJ**, Freeman JV & Preece MA Body mass index reference curves for the UK 1990  
46 *Archives of Disease in Childhood* 1995; **73**:17-24.
- 47  
48  
49  
50  
51  
52  
53  
54  
55  
56  
57  
58  
59  
60

1  
2 [26] **McCarthy HD**, Cole TJ, Fry T, Jebb SA & Prentice AM Body fat reference curves for children.  
3 *International Journal of Obesity* 2006; **30**: 598-602.  
4

5 [27] **McCarthy HD**, Jarrett KV, Crawley HF. The development of waist circumference percentiles  
6 in British children aged 5.0-16.9y. *European Journal of Clinical Nutrition* 2001; **55**: 902-907.  
7

8 [28] **James J**, Thomas P, Cavan D, Kerr D. Preventing childhood obesity by reducing  
9 consumption of carbonated drinks: cluster randomised controlled trial. *BMJ*. 2004; **22**: 1237-  
10 1239.  
11

12 [29] **Taylor RW**, Mcauley KA, Williams SM, Barbezat W, Nielsen G, Mann J. Reducing weight  
13 gain in children through enhancing physical activity and nutrition: the APPLE project. *Int J*  
14 *Pediatr Obes*. 2006; **1**(3):146-52.  
15

16  
17 [30] **Neumark-Sztainer D**, Haines J, Robinson-O'Brian R, Hannan J, Robins M et al. 'Ready. Set.  
18 ACTION!' A theater-based obesity prevention program for children: a feasibility study. *Health*  
19 *Education Research* 2008; **24**: 407-420.  
20

21  
22 [31] **Hughes AR**, Sherriff A, Lawlor DA, Ness AR, Reilly JJ. Timing of Excess Weight Gain in the  
23 Avon Longitudinal Study of Parents and Children (ALSPAC). *Pediatrics*. 2011; **127**(3):e730-6.  
24  
25 Epub 2011 Feb 21.  
26  
27  
28  
29  
30  
31  
32  
33  
34  
35  
36  
37  
38  
39  
40  
41  
42  
43  
44  
45  
46  
47  
48  
49  
50  
51  
52  
53  
54  
55  
56  
57  
58  
59  
60

Table 1 Intervention components, processes of behaviour change and methods of delivery

| Component                                                                                                       | Process of Behaviour change                                                                         | Method of delivery                                                                                                                                                                                                                                                                                                    | Delivered by                                                                                                     |
|-----------------------------------------------------------------------------------------------------------------|-----------------------------------------------------------------------------------------------------|-----------------------------------------------------------------------------------------------------------------------------------------------------------------------------------------------------------------------------------------------------------------------------------------------------------------------|------------------------------------------------------------------------------------------------------------------|
| <p><i>Component 1</i></p> <p>Engaging schools, children &amp; families</p> <p>Spring term (Yr 5)</p>            | Establish motivation and create a receptive environment                                             | <p>Whole school assembly</p> <p>Activity workshops (parents observe)</p> <p>Parents' evening (involving performances by the children)</p> <p>Newsletter articles</p>                                                                                                                                                  | <p>Researcher</p> <p>Professional sportsmen/dancers</p> <p>Teachers/Researcher/Drama group</p> <p>Researcher</p> |
| <p><i>Component 2</i></p> <p>Intensive Healthy Lifestyles Week – one week</p> <p>Summer term (Yr 5)</p>         | Establish motivation by developing children's confidence and skills and helping them make decisions | <p>PSHE lessons (morning)</p> <p>§Drama (afternoon) ( forum theatre; role play; food tasting, discussions, games etc)</p>                                                                                                                                                                                             | <p>Class teacher</p> <p>Drama group</p>                                                                          |
| <p><i>Component 3</i></p> <p>Goal Setting - goals set during week following drama</p> <p>Summer term (Yr 5)</p> | Take action by helping children create an action plan and implement goals.                          | <p>Questionnaire to enable children to reflect on snacking, consumption of fizzy drinks and physical activity.</p> <p>Goal setting sheet to go home to parents to complete with child.</p> <p>1:1 goal setting interview (goals sent home to parents)</p> <p>Parent's evening (child involvement – Forum Theatre)</p> | <p>Researcher/class teacher</p> <p>Researcher/parents</p> <p>Researcher</p> <p>Researcher/Drama group</p>        |
| <p><i>Component 4</i></p> <p>Reinforcement activities</p> <p>Autumn term (Yr 6)</p>                             | Stay motivated by helping children to monitor, assess and adapt goals                               | <p>Whole school assembly followed by drama workshops to remind school/children of messages and to prepare class assembly</p> <p>PSHE lesson to remind children of messages and goals.</p>                                                                                                                             | <p>Drama group</p>                                                                                               |

1  
2  
3  
4  
5  
6  
7  
8  
9  
10  
11  
12  
13  
14  
15  
16  
17  
18  
19  
20  
21  
22  
23  
24  
25  
26  
27  
28  
29  
30  
31  
32  
33  
34  
35  
36  
37  
38  
39  
40  
41  
42  
43  
44  
45  
46  
47  
48  
49  
50  
51  
52  
53  
54  
55  
56  
57  
58  
59  
60

|  |  |                                                                                                                                                                                                                                                                                                                              |                                                                                                                                                       |
|--|--|------------------------------------------------------------------------------------------------------------------------------------------------------------------------------------------------------------------------------------------------------------------------------------------------------------------------------|-------------------------------------------------------------------------------------------------------------------------------------------------------|
|  |  | <p>Children monitor goals on personalised chart</p> <p>Class to deliver assembly about the project to rest of school (parents invited to attend)</p> <p>1:1 goal supporting interview to discuss facilitators/barriers and to plan new coping strategies (renewed goals sent home to parents)</p> <p>Newsletter articles</p> | <p>Class teacher</p> <p>Class teacher provided prompts</p> <p>Children to all other year groups in the school</p> <p>Researcher</p> <p>Researcher</p> |
|--|--|------------------------------------------------------------------------------------------------------------------------------------------------------------------------------------------------------------------------------------------------------------------------------------------------------------------------------|-------------------------------------------------------------------------------------------------------------------------------------------------------|

§The drama framework includes 4 characters, each represented by one of the actors, whose attributes related to the three healthy lifestyle messages (overall behavioural objectives). Children choose which of the characters they most resemble then work with that actor to help the character learn to change their behaviour

**Table 2** Baseline characteristics of children

|                                                                         | <b>Intervention</b><br>(n=80) | <b>Control</b><br>(n=122)     | <b>Total</b><br>(n=202)       |
|-------------------------------------------------------------------------|-------------------------------|-------------------------------|-------------------------------|
| <b>Demographics</b>                                                     |                               |                               |                               |
| Age, years, mean (SD)                                                   | 9.69 (0.3)                    | 9.69 (0.3)                    | 9.69 (0.3)                    |
| <b>Sex</b>                                                              |                               |                               |                               |
| % (n) Male                                                              | 50 (40)                       | 50 (61)                       | 50 (101)                      |
| % (n) Female                                                            | 50 (40)                       | 50 (61)                       | 50 (101)                      |
| <b>Anthropometric Measures</b>                                          |                               |                               |                               |
| % (n) Overweight or Obese( $\geq 85^{\text{th}}$ centile) <sup>25</sup> | 23.7 (18)                     | 26.1 (31)                     | 25.1 (49)                     |
| Mean (sd) BMI<br>[range]                                                | 17.44 (2.6)<br>[13.3 to 25.4] | 17.89 (2.8)<br>[13.7 to 25.1] | 17.65 (2.7)<br>[13.3 to 25.4] |
| Mean (sd) BMI sds<br>[range]                                            | 0.3 (1.1)<br>[-2.3 to 2.5]    | 0.4 (1.1)<br>[-2.0 to 2.9]    | 0.3 (1.1)<br>[-2.3 to 2.9]    |

1  
2  
3 March 9<sup>th</sup> 2011  
4

5 Dear Zara,  
6

7  
8 As yet, no appropriate checklist has been created for the reporting of studies showing the  
9 development, feasibility and acceptability of interventions. Even the STROBE checklist has many  
10 sections that are not applicable, so as you suggest, I have not uploaded a checklist from the ones  
11 provided.  
12  
13

14  
15  
16 Best Wishes

17  
18 Jennifer Lloyd  
19  
20  
21  
22  
23  
24  
25  
26  
27  
28  
29  
30  
31  
32  
33  
34  
35  
36  
37  
38  
39  
40  
41  
42  
43  
44  
45  
46  
47  
48  
49  
50  
51  
52  
53  
54  
55  
56  
57  
58  
59  
60

For peer review only

Figure 1: Phase 1 – Development study (2005-2006).

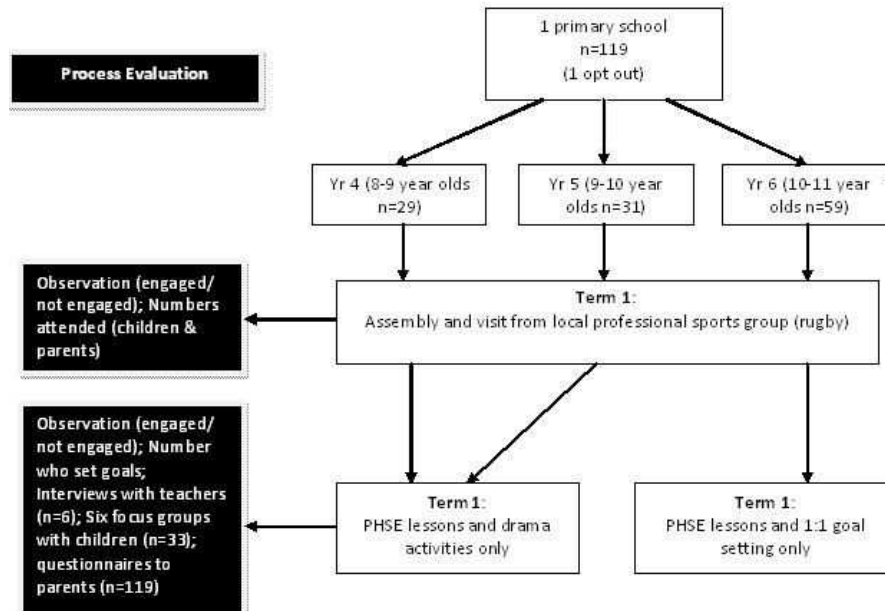

Phase 1 - Development study (2005-2006)  
59x44mm (300 x 300 DPI)

Review only

Figure 2: Phase 2 – 'Proof of concept' study (2006-2007)

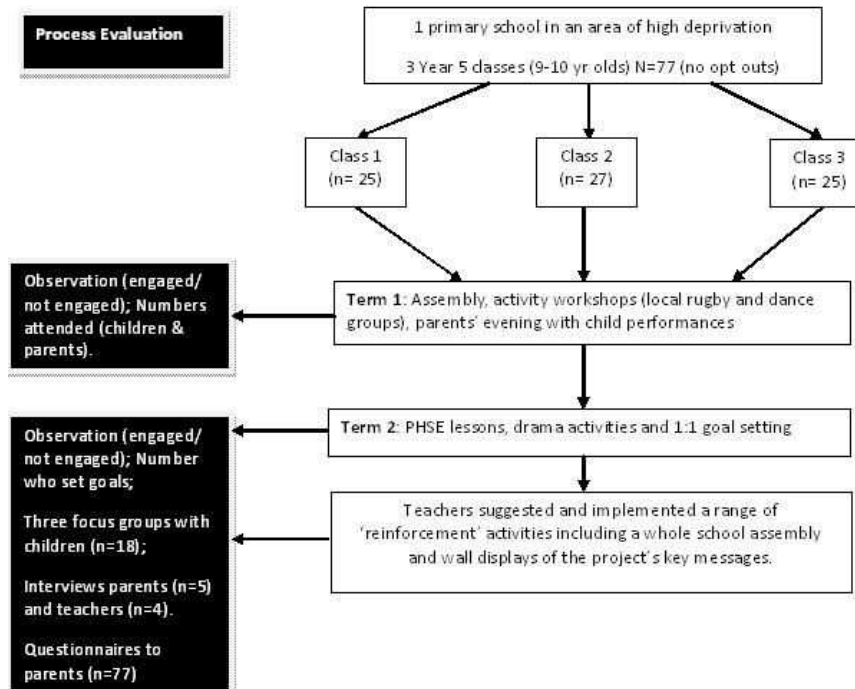

Phase 2 - 'Proof of concept' study (2006-2007)  
59x44mm (300 x 300 DPI)

Review only



Figure 3: Phase 3 – Exploratory trial 2008-2010

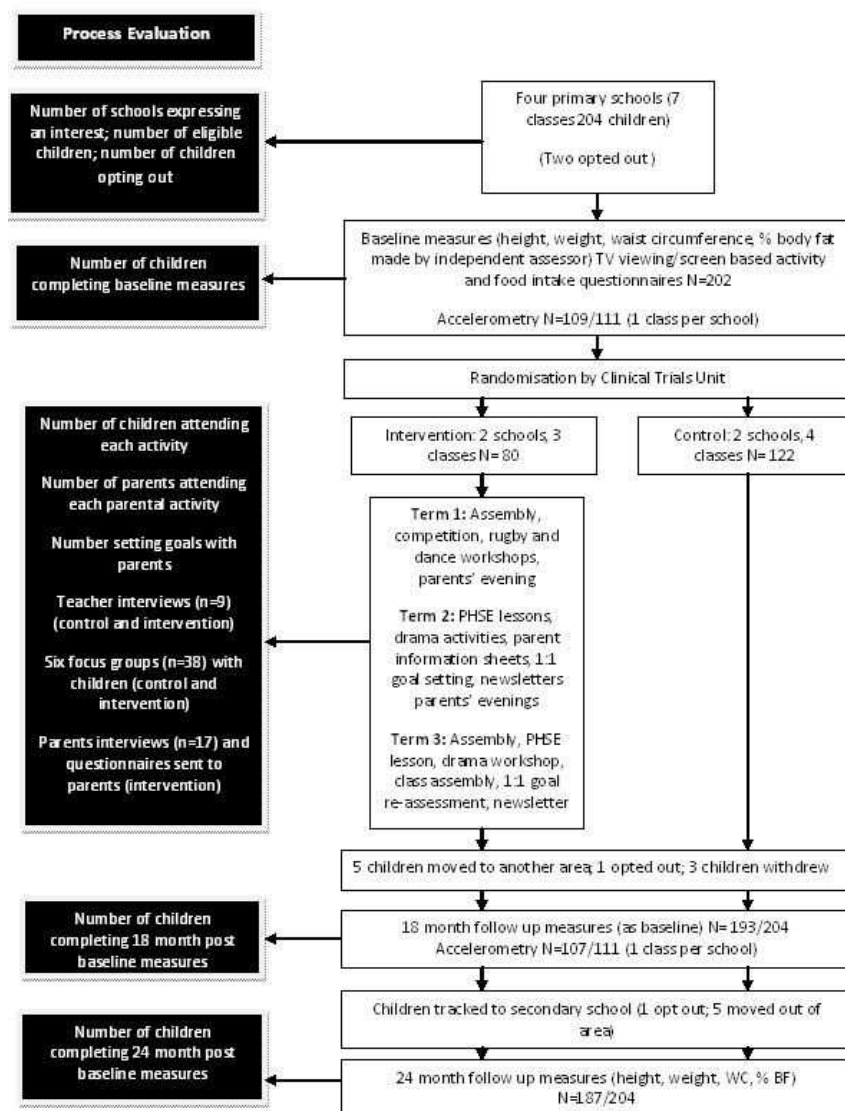Phase 3 - Exploratory randomised controlled trial (2008-2010)  
59x68mm (300 x 300 DPI)
